# Supplementary material for: Catalyst-proximity protein chemical labelling on affinity beads targeting endogenous lectins
Source: Royal Society of Chemistry journal article supplement (doi:10.1039/c9cc05231c), 2019-01-01
Supplement: c9cc05231c2.xlsx [file c9cc05231c2.xlsx]

## Sheet: Sheet1
Accession	FASTA.Title.Lines	Number.of.AAs	MW.in.kDa	calc.pI	Exp.q.value_s1	Sum.PEP.Score_s1	Number.of.Decoy.Proteins_s1	Coverage_s1	Number.of.Peptides_s1	Number.of.PSMs_s1	Number.of.Protein.Unique.Peptides_s1	Number.of.Unique.Peptides_s1	Modifications_s1	Exp.q.value_s2	Sum.PEP.Score_s2	Number.of.Decoy.Proteins_s2	Coverage_s2	Number.of.Peptides_s2	Number.of.PSMs_s2	Number.of.Protein.Unique.Peptides_s2	Number.of.Unique.Peptides_s2	Modifications_s2
A6NCN2	>sp|A6NCN2|KR87P_HUMAN Putative keratin-87 protein OS=Homo sapiens GN=KRT87P PE=5 SV=4	255	29.099	5.8	0	101.643	0	58.4314	22	112	4	4
P12270	>sp|P12270|TPR_HUMAN Nucleoprotein TPR OS=Homo sapiens GN=TPR PE=1 SV=3	2363	267.131	5.02	0	58.0596	0	11.3838	21	48	9	21
P09382	>sp|P09382|LEG1_HUMAN Galectin-1 OS=Homo sapiens GN=LGALS1 PE=1 SV=2	135	14.706	5.5	0	35.6553	0	63.7037	7	37	6	7
Q9Y230	>sp|Q9Y230|RUVB2_HUMAN RuvB-like 2 OS=Homo sapiens GN=RUVBL2 PE=1 SV=3	463	51.125	5.64	0	35.4306	0	27.2138	11	33	0	11
Q9Y230-2	>sp|Q9Y230-2|RUVB2_HUMAN Isoform 2 of RuvB-like 2 OS=Homo sapiens GN=RUVBL2	418	46.277	5.44	0	32.4041	0	27.512	10	30	0	10
Q13308-2	>sp|Q13308-2|PTK7_HUMAN Isoform 2 of Inactive tyrosine-protein kinase 7 OS=Homo sapiens GN=PTK7	1030	113.734	7.02	0	29.8749	0	14.2718	11	26	0	11
Q13308	>sp|Q13308|PTK7_HUMAN Inactive tyrosine-protein kinase 7 OS=Homo sapiens GN=PTK7 PE=1 SV=2	1070	118.317	7.09	0	29.8749	0	13.7383	11	26	0	11
Q13308-6	>sp|Q13308-6|PTK7_HUMAN Isoform 6 of Inactive tyrosine-protein kinase 7 OS=Homo sapiens GN=PTK7	1078	119.122	6.96	0	29.8749	0	13.6364	11	26	0	11
Q13308-3	>sp|Q13308-3|PTK7_HUMAN Isoform 3 of Inactive tyrosine-protein kinase 7 OS=Homo sapiens GN=PTK7	940	103.515	7.09	0	27.4443	0	14.2553	10	25	0	10
P32929-2	>sp|P32929-2|CGL_HUMAN Isoform 2 of Cystathionine gamma-lyase OS=Homo sapiens GN=CTH	361	39.48	6.9	0	24.8181	0	34.072	8	24	0	8
P16144-5	>sp|P16144-5|ITB4_HUMAN Isoform Beta-4E of Integrin beta-4 OS=Homo sapiens GN=ITGB4	964	106.709	6.3	0	29.2755	0	12.8631	9	24	0	9
Q01469	>sp|Q01469|FABP5_HUMAN Fatty acid-binding protein, epidermal OS=Homo sapiens GN=FABP5 PE=1 SV=3	135	15.155	7.01	0	31.2429	0	64.4444	9	23	1	9
Q13308-4	>sp|Q13308-4|PTK7_HUMAN Isoform 4 of Inactive tyrosine-protein kinase 7 OS=Homo sapiens GN=PTK7	1014	112.19	7.05	0	27.1005	0	13.3136	10	23	0	10
P17931	>sp|P17931|LEG3_HUMAN Galectin-3 OS=Homo sapiens GN=LGALS3 PE=1 SV=5	250	26.136	8.56	0	19.0074	0	24	5	22	2	5
P12270-2	>sp|P12270-2|TPR_HUMAN Isoform 2 of Nucleoprotein TPR OS=Homo sapiens GN=TPR	726	83.928	5.5	0	27.2952	0	18.1818	10	22	0	10
P61978-3	>sp|P61978-3|HNRPK_HUMAN Isoform 3 of Heterogeneous nuclear ribonucleoprotein K OS=Homo sapiens GN=HNRNPK	440	48.532	5.54	0	21.2373	0	26.3636	8	22	0	8
P61978	>sp|P61978|HNRPK_HUMAN Heterogeneous nuclear ribonucleoprotein K OS=Homo sapiens GN=HNRNPK PE=1 SV=1	463	50.944	5.54	0	21.2373	0	25.054	8	22	0	8
P61978-2	>sp|P61978-2|HNRPK_HUMAN Isoform 2 of Heterogeneous nuclear ribonucleoprotein K OS=Homo sapiens GN=HNRNPK	464	50.996	5.33	0	21.2373	0	25	8	22	0	8
P05783	>sp|P05783|K1C18_HUMAN Keratin, type I cytoskeletal 18 OS=Homo sapiens GN=KRT18 PE=1 SV=2	430	48.029	5.45	0	13.2327	0	10	6	22	0	3
P62333	>sp|P62333|PRS10_HUMAN 26S protease regulatory subunit 10B OS=Homo sapiens GN=PSMC6 PE=1 SV=1	389	44.145	7.49	0	21.2653	0	22.6221	7	21	0	7
P30048-2	>sp|P30048-2|PRDX3_HUMAN Isoform 2 of Thioredoxin-dependent peroxide reductase, mitochondrial OS=Homo sapiens GN=PRDX3	238	25.822	7.46	0	21.0512	0	43.2773	7	20	0	7
P30048	>sp|P30048|PRDX3_HUMAN Thioredoxin-dependent peroxide reductase, mitochondrial OS=Homo sapiens GN=PRDX3 PE=1 SV=3	256	27.675	7.78	0	21.0512	0	40.2344	7	20	0	7
Q9Y266	>sp|Q9Y266|NUDC_HUMAN Nuclear migration protein nudC OS=Homo sapiens GN=NUDC PE=1 SV=1	331	38.219	5.38	0	22.1747	0	28.0967	8	20	3	8
P17301	>sp|P17301|ITA2_HUMAN Integrin alpha-2 OS=Homo sapiens GN=ITGA2 PE=1 SV=1	1181	129.214	5.31	0	25.3178	0	10.0762	9	20	2	9
O43399	>sp|O43399|TPD54_HUMAN Tumor protein D54 OS=Homo sapiens GN=TPD52L2 PE=1 SV=2	206	22.224	5.36	0	26.2294	0	47.0874	8	20	0	8
O43399-5	>sp|O43399-5|TPD54_HUMAN Isoform 5 of Tumor protein D54 OS=Homo sapiens GN=TPD52L2	220	23.772	5.73	0	26.2294	0	44.0909	8	20	0	8
O43399-7	>sp|O43399-7|TPD54_HUMAN Isoform 7 of Tumor protein D54 OS=Homo sapiens GN=TPD52L2	229	24.839	6.42	0	26.2294	0	42.3581	8	20	0	8
P42704	>sp|P42704|LPPRC_HUMAN Leucine-rich PPR motif-containing protein, mitochondrial OS=Homo sapiens GN=LRPPRC PE=1 SV=3	1394	157.805	6.13	0	17.1282	0	5.95409	7	20	4	7
Q9BZK7	>sp|Q9BZK7|TBL1R_HUMAN F-box-like/WD repeat-containing protein TBL1XR1 OS=Homo sapiens GN=TBL1XR1 PE=1 SV=1	514	55.56	5.55	0	26.4526	0	22.3735	7	19	0	7
Q8WUM4	>sp|Q8WUM4|PDC6I_HUMAN Programmed cell death 6-interacting protein OS=Homo sapiens GN=PDCD6IP PE=1 SV=1	868	95.963	6.52	0	20.0747	0	8.87097	7	19	0	7
Q8WUM4-2	>sp|Q8WUM4-2|PDC6I_HUMAN Isoform 2 of Programmed cell death 6-interacting protein OS=Homo sapiens GN=PDCD6IP	873	96.711	6.52	0	20.0747	0	8.82016	7	19	0	7
Q9NZL9	>sp|Q9NZL9|MAT2B_HUMAN Methionine adenosyltransferase 2 subunit beta OS=Homo sapiens GN=MAT2B PE=1 SV=1	334	37.528	7.36	0	15.6545	0	19.7605	6	18	0	6
P30044-2	>sp|P30044-2|PRDX5_HUMAN Isoform Cytoplasmic+peroxisomal of Peroxiredoxin-5, mitochondrial OS=Homo sapiens GN=PRDX5	162	17.02	7.24	0	19.0106	0	41.358	6	18	0	6
P30044	>sp|P30044|PRDX5_HUMAN Peroxiredoxin-5, mitochondrial OS=Homo sapiens GN=PRDX5 PE=1 SV=4	214	22.073	8.7	0	19.0106	0	31.3084	6	18	0	6
P31946-2	>sp|P31946-2|1433B_HUMAN Isoform Short of 14-3-3 protein beta/alpha OS=Homo sapiens GN=YWHAB	244	27.833	4.83	0	17.7424	0	31.1475	7	18	1	4	Acetyl [N-Term]
P49915	>sp|P49915|GUAA_HUMAN GMP synthase [glutamine-hydrolyzing] OS=Homo sapiens GN=GMPS PE=1 SV=1	693	76.667	6.87	0	17.9552	0	11.2554	6	18	1	6
P16435	>sp|P16435|NCPR_HUMAN NADPH--cytochrome P450 reductase OS=Homo sapiens GN=POR PE=1 SV=2	677	76.641	5.58	0	16.0141	0	14.1802	6	18	1	6
Q14651	>sp|Q14651|PLSI_HUMAN Plastin-1 OS=Homo sapiens GN=PLS1 PE=1 SV=2	629	70.209	5.41	0	19.1205	0	13.1955	6	18	2	4
P61204	>sp|P61204|ARF3_HUMAN ADP-ribosylation factor 3 OS=Homo sapiens GN=ARF3 PE=1 SV=2	181	20.588	7.43	0	19.5383	0	40.884	7	18	0	4
P84077	>sp|P84077|ARF1_HUMAN ADP-ribosylation factor 1 OS=Homo sapiens GN=ARF1 PE=1 SV=2	181	20.684	6.8	0	19.5383	0	40.884	7	18	0	4
Q58FF6	>sp|Q58FF6|H90B4_HUMAN Putative heat shock protein HSP 90-beta 4 OS=Homo sapiens GN=HSP90AB4P PE=5 SV=1	505	58.228	4.73	0	18.7261	0	9.70297	5	18	1	0
P16949	>sp|P16949|STMN1_HUMAN Stathmin OS=Homo sapiens GN=STMN1 PE=1 SV=3	149	17.292	5.97	0	16.994	0	32.8859	6	17	1	6
O75083	>sp|O75083|WDR1_HUMAN WD repeat-containing protein 1 OS=Homo sapiens GN=WDR1 PE=1 SV=4	606	66.152	6.65	0	15.8966	0	14.5215	7	17	0	7
O95336	>sp|O95336|6PGL_HUMAN 6-phosphogluconolactonase OS=Homo sapiens GN=PGLS PE=1 SV=2	258	27.53	6.05	0	16.5907	0	28.2946	6	17	0	6
O43399-2	>sp|O43399-2|TPD54_HUMAN Isoform 2 of Tumor protein D54 OS=Homo sapiens GN=TPD52L2	186	19.889	5.48	0	23.2179	0	45.1613	7	17	0	7
O43399-4	>sp|O43399-4|TPD54_HUMAN Isoform 4 of Tumor protein D54 OS=Homo sapiens GN=TPD52L2	200	21.437	5.99	0	23.2179	0	42	7	17	0	7
O43399-3	>sp|O43399-3|TPD54_HUMAN Isoform 3 of Tumor protein D54 OS=Homo sapiens GN=TPD52L2	209	22.503	6.7	0	23.2179	0	40.1914	7	17	0	7
P49368	>sp|P49368|TCPG_HUMAN T-complex protein 1 subunit gamma OS=Homo sapiens GN=CCT3 PE=1 SV=4	545	60.495	6.49	0	17.8207	0	15.7798	7	17	0	7
O60664-4	>sp|O60664-4|PLIN3_HUMAN Isoform 4 of Perilipin-3 OS=Homo sapiens GN=PLIN3	422	45.775	5.43	0	23.229	0	25.3555	8	17	0	8
O60664-3	>sp|O60664-3|PLIN3_HUMAN Isoform 3 of Perilipin-3 OS=Homo sapiens GN=PLIN3	433	46.918	5.44	0	23.229	0	24.7113	8	17	0	8
O60664	>sp|O60664|PLIN3_HUMAN Perilipin-3 OS=Homo sapiens GN=PLIN3 PE=1 SV=3	434	47.046	5.44	0	23.229	0	24.6544	8	17	0	8
Q9UMX0-2	>sp|Q9UMX0-2|UBQL1_HUMAN Isoform 2 of Ubiquilin-1 OS=Homo sapiens GN=UBQLN1	561	59.183	5.1	0	19.8652	0	13.369	6	16	0	6
Q9UMX0	>sp|Q9UMX0|UBQL1_HUMAN Ubiquilin-1 OS=Homo sapiens GN=UBQLN1 PE=1 SV=2	589	62.479	5.11	0	19.8652	0	12.7334	6	16	0	6
P56537	>sp|P56537|IF6_HUMAN Eukaryotic translation initiation factor 6 OS=Homo sapiens GN=EIF6 PE=1 SV=1	245	26.582	4.68	0	15.0658	0	35.5102	5	16	0	5
P49755	>sp|P49755|TMEDA_HUMAN Transmembrane emp24 domain-containing protein 10 OS=Homo sapiens GN=TMED10 PE=1 SV=2	219	24.96	7.44	0	14.7937	0	22.3744	4	16	2	4
Q15084-3	>sp|Q15084-3|PDIA6_HUMAN Isoform 3 of Protein disulfide-isomerase A6 OS=Homo sapiens GN=PDIA6	437	47.808	5.08	0	21.5609	0	17.3913	6	16	0	6
Q15084	>sp|Q15084|PDIA6_HUMAN Protein disulfide-isomerase A6 OS=Homo sapiens GN=PDIA6 PE=1 SV=1	440	48.091	5.08	0	21.5609	0	17.2727	6	16	0	6
Q15084-4	>sp|Q15084-4|PDIA6_HUMAN Isoform 4 of Protein disulfide-isomerase A6 OS=Homo sapiens GN=PDIA6	445	48.615	5.08	0	21.5609	0	17.0787	6	16	0	6
Q15084-5	>sp|Q15084-5|PDIA6_HUMAN Isoform 5 of Protein disulfide-isomerase A6 OS=Homo sapiens GN=PDIA6	488	53.228	5.53	0	21.5609	0	15.5738	6	16	0	6
Q15084-2	>sp|Q15084-2|PDIA6_HUMAN Isoform 2 of Protein disulfide-isomerase A6 OS=Homo sapiens GN=PDIA6	492	53.867	5.33	0	21.5609	0	15.4472	6	16	0	6
P17980	>sp|P17980|PRS6A_HUMAN 26S protease regulatory subunit 6A OS=Homo sapiens GN=PSMC3 PE=1 SV=3	439	49.172	5.24	0	19.0197	0	18.2232	7	16	0	7
P63104	>sp|P63104|1433Z_HUMAN 14-3-3 protein zeta/delta OS=Homo sapiens GN=YWHAZ PE=1 SV=1	245	27.728	4.79	0	24.9504	0	39.1837	8	16	0	7
P49411	>sp|P49411|EFTU_HUMAN Elongation factor Tu, mitochondrial OS=Homo sapiens GN=TUFM PE=1 SV=2	452	49.51	7.61	0	13.887	0	15.4867	5	15	5	5
P25786	>sp|P25786|PSA1_HUMAN Proteasome subunit alpha type-1 OS=Homo sapiens GN=PSMA1 PE=1 SV=1	263	29.537	6.61	0	18.2648	0	28.8973	6	15	0	6
P25786-2	>sp|P25786-2|PSA1_HUMAN Isoform Long of Proteasome subunit alpha type-1 OS=Homo sapiens GN=PSMA1	269	30.22	6.99	0	18.2648	0	28.2528	6	15	0	6
Q14568	>sp|Q14568|HS902_HUMAN Heat shock protein HSP 90-alpha A2 OS=Homo sapiens GN=HSP90AA2P PE=1 SV=2	343	39.34	4.65	0	12.5068	0	13.4111	5	15	0	1
P04632	>sp|P04632|CPNS1_HUMAN Calpain small subunit 1 OS=Homo sapiens GN=CAPNS1 PE=1 SV=1	268	28.298	5.2	0	13.3754	0	23.5075	5	15	0	5
Q13308-5	>sp|Q13308-5|PTK7_HUMAN Isoform 5 of Inactive tyrosine-protein kinase 7 OS=Homo sapiens GN=PTK7	816	89.707	6.98	0	17.8104	0	9.55882	6	15	0	6
P30044-3	>sp|P30044-3|PRDX5_HUMAN Isoform 3 of Peroxiredoxin-5, mitochondrial OS=Homo sapiens GN=PRDX5	170	17.443	8.94	0	16.1933	0	31.1765	5	15	0	5
P05198	>sp|P05198|IF2A_HUMAN Eukaryotic translation initiation factor 2 subunit 1 OS=Homo sapiens GN=EIF2S1 PE=1 SV=3	315	36.089	5.08	0	16.6089	0	22.8571	7	15	2	7
Q9UKK9	>sp|Q9UKK9|NUDT5_HUMAN ADP-sugar pyrophosphatase OS=Homo sapiens GN=NUDT5 PE=1 SV=1	219	24.312	4.94	0	15.814	0	32.8767	6	15	0	6
P31946	>sp|P31946|1433B_HUMAN 14-3-3 protein beta/alpha OS=Homo sapiens GN=YWHAB PE=1 SV=3	246	28.065	4.83	0	14.6669	0	27.2358	6	15	0	3
Q99832-2	>sp|Q99832-2|TCPH_HUMAN Isoform 2 of T-complex protein 1 subunit eta OS=Homo sapiens GN=CCT7	339	37.475	6.46	0	13.5422	0	21.5339	6	15	0	6
Q99832-4	>sp|Q99832-4|TCPH_HUMAN Isoform 4 of T-complex protein 1 subunit eta OS=Homo sapiens GN=CCT7	456	50.32	7.88	0	13.5422	0	16.0088	6	15	0	6
Q99832-3	>sp|Q99832-3|TCPH_HUMAN Isoform 3 of T-complex protein 1 subunit eta OS=Homo sapiens GN=CCT7	499	54.77	7.68	0	13.5422	0	14.6293	6	15	0	6
Q99832	>sp|Q99832|TCPH_HUMAN T-complex protein 1 subunit eta OS=Homo sapiens GN=CCT7 PE=1 SV=2	543	59.329	7.65	0	13.5422	0	13.4438	6	15	0	6
Q9Y4L1	>sp|Q9Y4L1|HYOU1_HUMAN Hypoxia up-regulated protein 1 OS=Homo sapiens GN=HYOU1 PE=1 SV=1	999	111.266	5.22	0	12.4964	0	5.70571	5	15	0	5
Q9NUQ9	>sp|Q9NUQ9|FA49B_HUMAN Protein FAM49B OS=Homo sapiens GN=FAM49B PE=1 SV=1	324	36.725	6.06	0	18.4736	0	26.5432	6	15	0	6
P04843	>sp|P04843|RPN1_HUMAN Dolichyl-diphosphooligosaccharide--protein glycosyltransferase subunit 1 OS=Homo sapiens GN=RPN1 PE=1 SV=1	607	68.527	6.38	0	19.6715	0	13.0148	6	15	0	6
P17812-2	>sp|P17812-2|PYRG1_HUMAN Isoform 2 of CTP synthase 1 OS=Homo sapiens GN=CTPS1	360	41.194	6.89	0	14.2876	0	13.8889	5	15	0	5
O75439	>sp|O75439|MPPB_HUMAN Mitochondrial-processing peptidase subunit beta OS=Homo sapiens GN=PMPCB PE=1 SV=2	489	54.331	6.83	0	16.0168	0	12.8834	6	15	1	6
Q9NQW7	>sp|Q9NQW7|XPP1_HUMAN Xaa-Pro aminopeptidase 1 OS=Homo sapiens GN=XPNPEP1 PE=1 SV=3	623	69.873	5.67	0	16.2956	0	11.3965	6	15	0	6
Q9NQW7-3	>sp|Q9NQW7-3|XPP1_HUMAN Isoform 3 of Xaa-Pro aminopeptidase 1 OS=Homo sapiens GN=XPNPEP1	666	74.751	5.88	0	16.2956	0	10.6607	6	15	0	6
P46940	>sp|P46940|IQGA1_HUMAN Ras GTPase-activating-like protein IQGAP1 OS=Homo sapiens GN=IQGAP1 PE=1 SV=1	1657	189.134	6.48	0	17.9277	0	4.64695	5	15	0	5
P16949-2	>sp|P16949-2|STMN1_HUMAN Isoform 2 of Stathmin OS=Homo sapiens GN=STMN1	174	19.811	7.02	0	14.63	0	23.5632	5	14	0	5
Q8NFI4	>sp|Q8NFI4|F10A5_HUMAN Putative protein FAM10A5 OS=Homo sapiens GN=ST13P5 PE=5 SV=1	369	41.351	5.05	0	14.9447	0	14.6341	5	14	0	5
Q9NZL9-3	>sp|Q9NZL9-3|MAT2B_HUMAN Isoform 3 of Methionine adenosyltransferase 2 subunit beta OS=Homo sapiens GN=MAT2B	259	28.936	6.74	0	12.7387	0	21.2355	5	14	0	5
Q58FG0	>sp|Q58FG0|HS905_HUMAN Putative heat shock protein HSP 90-alpha A5 OS=Homo sapiens GN=HSP90AA5P PE=2 SV=1	334	38.714	6.57	0	12.5643	0	9.28144	5	14	0	1
P78330	>sp|P78330|SERB_HUMAN Phosphoserine phosphatase OS=Homo sapiens GN=PSPH PE=1 SV=2	225	24.992	5.69	0	15.2347	0	24.4444	5	14	0	5	Acetyl [N-Term]
P12004	>sp|P12004|PCNA_HUMAN Proliferating cell nuclear antigen OS=Homo sapiens GN=PCNA PE=1 SV=1	261	28.75	4.69	0	17.2444	0	25.2874	5	14	5	5
P13798	>sp|P13798|ACPH_HUMAN Acylamino-acid-releasing enzyme OS=Homo sapiens GN=APEH PE=1 SV=4	732	81.173	5.48	0	16.5633	0	9.01639	6	14	0	6
P28070	>sp|P28070|PSB4_HUMAN Proteasome subunit beta type-4 OS=Homo sapiens GN=PSMB4 PE=1 SV=4	264	29.185	5.97	0	14.5903	0	29.1667	5	14	5	5
P61981	>sp|P61981|1433G_HUMAN 14-3-3 protein gamma OS=Homo sapiens GN=YWHAG PE=1 SV=2	247	28.285	4.89	0	14.3571	0	19.8381	5	14	2	2
O43399-6	>sp|O43399-6|TPD54_HUMAN Isoform 6 of Tumor protein D54 OS=Homo sapiens GN=TPD52L2	163	17.463	6.6	0	19.6322	0	39.8773	6	14	0	6
P63241	>sp|P63241|IF5A1_HUMAN Eukaryotic translation initiation factor 5A-1 OS=Homo sapiens GN=EIF5A PE=1 SV=2	154	16.821	5.24	0	16.4047	0	23.3766	3	14	0	3
P63241-2	>sp|P63241-2|IF5A1_HUMAN Isoform 2 of Eukaryotic translation initiation factor 5A-1 OS=Homo sapiens GN=EIF5A	184	20.157	7.01	0	16.4047	0	19.5652	3	14	0	3
P49915-2	>sp|P49915-2|GUAA_HUMAN Isoform 2 of GMP synthase [glutamine-hydrolyzing] OS=Homo sapiens GN=GMPS	594	65.887	7.47	0	15.0438	0	9.93266	5	14	0	5
P18206-3	>sp|P18206-3|VINC_HUMAN Isoform 3 of Vinculin OS=Homo sapiens GN=VCL	222	24.888	5.71	0	13.8212	0	27.4775	5	14	0	5
P49368-2	>sp|P49368-2|TCPG_HUMAN Isoform 2 of T-complex protein 1 subunit gamma OS=Homo sapiens GN=CCT3	507	56.395	6.49	0	14.615	0	14.9901	6	14	0	6
P56537-2	>sp|P56537-2|IF6_HUMAN Isoform 2 of Eukaryotic translation initiation factor 6 OS=Homo sapiens GN=EIF6	226	23.72	5.17	0	12.3677	0	34.0708	4	13	0	4
P61163	>sp|P61163|ACTZ_HUMAN Alpha-centractin OS=Homo sapiens GN=ACTR1A PE=1 SV=1	376	42.587	6.64	0	12.6514	0	19.1489	5	13	0	4
A0AVT1	>sp|A0AVT1|UBA6_HUMAN Ubiquitin-like modifier-activating enzyme 6 OS=Homo sapiens GN=UBA6 PE=1 SV=1	1052	117.895	6.14	0	15.8376	0	6.55894	6	13	0	6
Q9Y624	>sp|Q9Y624|JAM1_HUMAN Junctional adhesion molecule A OS=Homo sapiens GN=F11R PE=1 SV=1	299	32.562	7.9	0	15.486	0	21.4047	6	13	1	6
Q9NY33-4	>sp|Q9NY33-4|DPP3_HUMAN Isoform 4 of Dipeptidyl peptidase 3 OS=Homo sapiens GN=DPP3	707	79.258	5.03	0	12.67	0	8.20368	5	13	0	5
Q9NY33	>sp|Q9NY33|DPP3_HUMAN Dipeptidyl peptidase 3 OS=Homo sapiens GN=DPP3 PE=1 SV=2	737	82.538	5.1	0	12.67	0	7.86974	5	13	0	5
Q9NZL9-4	>sp|Q9NZL9-4|MAT2B_HUMAN Isoform 4 of Methionine adenosyltransferase 2 subunit beta OS=Homo sapiens GN=MAT2B	306	34.561	6.54	0	11.729	0	13.7255	4	12	0	4
Q9NZL9-2	>sp|Q9NZL9-2|MAT2B_HUMAN Isoform 2 of Methionine adenosyltransferase 2 subunit beta OS=Homo sapiens GN=MAT2B	323	36.378	6.65	0	11.729	0	13.0031	4	12	0	4
P28066	>sp|P28066|PSA5_HUMAN Proteasome subunit alpha type-5 OS=Homo sapiens GN=PSMA5 PE=1 SV=3	241	26.394	4.79	0	15.1799	0	29.0456	5	12	2	5
P09496-5	>sp|P09496-5|CLCA_HUMAN Isoform 5 of Clathrin light chain A OS=Homo sapiens GN=CLTA	166	17.677	4.64	0	13.8138	0	19.2771	3	12	0	3
O43175	>sp|O43175|SERA_HUMAN D-3-phosphoglycerate dehydrogenase OS=Homo sapiens GN=PHGDH PE=1 SV=4	533	56.614	6.71	0	13.8259	0	16.6979	6	12	2	6
Q58FF3	>sp|Q58FF3|ENPLL_HUMAN Putative endoplasmin-like protein OS=Homo sapiens GN=HSP90B2P PE=5 SV=1	399	45.83	5.26	0	11.8698	0	8.5213	4	12	0	4
Q86X55-1	>sp|Q86X55-1|CARM1_HUMAN Isoform 1 of Histone-arginine methyltransferase CARM1 OS=Homo sapiens GN=CARM1	585	63.419	6.57	0	15.2948	0	12.8205	5	12	0	5
Q86X55	>sp|Q86X55|CARM1_HUMAN Histone-arginine methyltransferase CARM1 OS=Homo sapiens GN=CARM1 PE=1 SV=3	608	65.811	6.73	0	15.2948	0	12.3355	5	12	0	5
Q9HCC0-2	>sp|Q9HCC0-2|MCCB_HUMAN Isoform 2 of Methylcrotonoyl-CoA carboxylase beta chain, mitochondrial OS=Homo sapiens GN=MCCC2	525	57.482	7.71	0	18.3986	0	14.4762	6	12	0	6
Q9HCC0	>sp|Q9HCC0|MCCB_HUMAN Methylcrotonoyl-CoA carboxylase beta chain, mitochondrial OS=Homo sapiens GN=MCCC2 PE=1 SV=1	563	61.294	7.68	0	18.3986	0	13.4991	6	12	0	6
P30837	>sp|P30837|AL1B1_HUMAN Aldehyde dehydrogenase X, mitochondrial OS=Homo sapiens GN=ALDH1B1 PE=1 SV=3	517	57.17	6.8	0	12.0441	0	10.058	4	12	4	4
Q9NUQ9-2	>sp|Q9NUQ9-2|FA49B_HUMAN Isoform 2 of Protein FAM49B OS=Homo sapiens GN=FAM49B	178	20.18	7.8	0	14.3008	0	41.0112	5	12	0	5
Q9NQW7-2	>sp|Q9NQW7-2|XPP1_HUMAN Isoform 2 of Xaa-Pro aminopeptidase 1 OS=Homo sapiens GN=XPNPEP1	599	67.184	5.81	0	12.7946	0	9.01503	5	12	0	5
Q9NQW7-4	>sp|Q9NQW7-4|XPP1_HUMAN Isoform 4 of Xaa-Pro aminopeptidase 1 OS=Homo sapiens GN=XPNPEP1	642	72.061	6.02	0	12.7946	0	8.41121	5	12	0	5
P84085	>sp|P84085|ARF5_HUMAN ADP-ribosylation factor 5 OS=Homo sapiens GN=ARF5 PE=1 SV=2	180	20.517	6.79	0	12.2296	0	22.2222	4	12	0	1
P24534	>sp|P24534|EF1B_HUMAN Elongation factor 1-beta OS=Homo sapiens GN=EEF1B2 PE=1 SV=3	225	24.748	4.67	0	11.9133	0	19.5556	4	11	2	4
P52907	>sp|P52907|CAZA1_HUMAN F-actin-capping protein subunit alpha-1 OS=Homo sapiens GN=CAPZA1 PE=1 SV=3	286	32.902	5.69	0	11.8814	0	22.028	4	11	3	4
Q9UMX0-3	>sp|Q9UMX0-3|UBQL1_HUMAN Isoform 3 of Ubiquilin-1 OS=Homo sapiens GN=UBQLN1	412	43.011	4.6	0	15.7628	0	12.8641	4	11	0	4
P01893	>sp|P01893|HLAH_HUMAN Putative HLA class I histocompatibility antigen, alpha chain H OS=Homo sapiens GN=HLA-H PE=5 SV=3	362	40.866	6.3	0	15.5205	0	17.6796	4	11	0	0
P30044-4	>sp|P30044-4|PRDX5_HUMAN Isoform 4 of Peroxiredoxin-5, mitochondrial OS=Homo sapiens GN=PRDX5	125	12.889	9.41	0	11.7471	0	23.2	3	11	0	3
P16070-18	>sp|P16070-18|CD44_HUMAN Isoform 18 of CD44 antigen OS=Homo sapiens GN=CD44	340	37.254	5.52	0	12.1306	0	13.8235	4	11	0	4
P16070-12	>sp|P16070-12|CD44_HUMAN Isoform 12 of CD44 antigen OS=Homo sapiens GN=CD44	361	39.391	5.41	0	12.1306	0	13.0194	4	11	0	4
P16070-14	>sp|P16070-14|CD44_HUMAN Isoform 14 of CD44 antigen OS=Homo sapiens GN=CD44	396	43.142	5.35	0	12.1306	0	11.8687	4	11	0	4
P16070-13	>sp|P16070-13|CD44_HUMAN Isoform 13 of CD44 antigen OS=Homo sapiens GN=CD44	425	46.232	5.16	0	12.1306	0	11.0588	4	11	0	4
P16070-11	>sp|P16070-11|CD44_HUMAN Isoform 11 of CD44 antigen OS=Homo sapiens GN=CD44	429	46.537	5.74	0	12.1306	0	10.9557	4	11	0	4
P16070-10	>sp|P16070-10|CD44_HUMAN Isoform 10 of CD44 antigen OS=Homo sapiens GN=CD44	493	53.378	5.4	0	12.1306	0	9.53347	4	11	0	4
P16070-16	>sp|P16070-16|CD44_HUMAN Isoform 16 of CD44 antigen OS=Homo sapiens GN=CD44	668	73.105	5.43	0	12.1306	0	7.03593	4	11	0	4
P16070-8	>sp|P16070-8|CD44_HUMAN Isoform 8 of CD44 antigen OS=Homo sapiens GN=CD44	674	74.342	5.2	0	12.1306	0	6.97329	4	11	0	4
P16070-17	>sp|P16070-17|CD44_HUMAN Isoform 17 of CD44 antigen OS=Homo sapiens GN=CD44	691	75.91	5.31	0	12.1306	0	6.80174	4	11	0	4
P16070-4	>sp|P16070-4|CD44_HUMAN Isoform 4 of CD44 antigen OS=Homo sapiens GN=CD44	699	76.565	5.27	0	12.1306	0	6.72389	4	11	0	4
P16070-6	>sp|P16070-6|CD44_HUMAN Isoform 6 of CD44 antigen OS=Homo sapiens GN=CD44	699	76.657	5.31	0	12.1306	0	6.72389	4	11	0	4
P16070-3	>sp|P16070-3|CD44_HUMAN Isoform 3 of CD44 antigen OS=Homo sapiens GN=CD44	711	77.935	5.44	0	12.1306	0	6.61041	4	11	0	4
P16070-7	>sp|P16070-7|CD44_HUMAN Isoform 7 of CD44 antigen OS=Homo sapiens GN=CD44	713	78.397	5.44	0	12.1306	0	6.59187	4	11	0	4
P16070-5	>sp|P16070-5|CD44_HUMAN Isoform 5 of CD44 antigen OS=Homo sapiens GN=CD44	734	80.74	5.33	0	12.1306	0	6.40327	4	11	0	4
P16070	>sp|P16070|CD44_HUMAN CD44 antigen OS=Homo sapiens GN=CD44 PE=1 SV=3	742	81.487	5.33	0	12.1306	0	6.33423	4	11	0	4
O95571	>sp|O95571|ETHE1_HUMAN Persulfide dioxygenase ETHE1, mitochondrial OS=Homo sapiens GN=ETHE1 PE=1 SV=2	254	27.855	6.83	0	12.3162	0	22.4409	5	11	0	5
P06748-3	>sp|P06748-3|NPM_HUMAN Isoform 3 of Nucleophosmin OS=Homo sapiens GN=NPM1	259	28.383	4.72	0	12.379	0	18.9189	3	11	0	3
P06748-2	>sp|P06748-2|NPM_HUMAN Isoform 2 of Nucleophosmin OS=Homo sapiens GN=NPM1	265	29.446	4.61	0	12.379	0	18.4906	3	11	0	3
P06748	>sp|P06748|NPM_HUMAN Nucleophosmin OS=Homo sapiens GN=NPM1 PE=1 SV=2	294	32.555	4.78	0	12.379	0	16.6667	3	11	0	3
Q99102-16	>sp|Q99102-16|MUC4_HUMAN Isoform 16 of Mucin-4 OS=Homo sapiens GN=MUC4	1384	144.758	6.93	0	15.3898	0	6.14162	5	11	0	5
P15311	>sp|P15311|EZRI_HUMAN Ezrin OS=Homo sapiens GN=EZR PE=1 SV=4	586	69.37	6.27	0	14.6887	0	6.82594	4	11	0	4
P46109	>sp|P46109|CRKL_HUMAN Crk-like protein OS=Homo sapiens GN=CRKL PE=1 SV=1	303	33.756	6.74	0	11.8948	0	18.4818	4	11	4	4
P12268	>sp|P12268|IMDH2_HUMAN Inosine-5'-monophosphate dehydrogenase 2 OS=Homo sapiens GN=IMPDH2 PE=1 SV=2	514	55.77	6.9	0	14.9347	0	12.4514	6	11	0	6
P48147	>sp|P48147|PPCE_HUMAN Prolyl endopeptidase OS=Homo sapiens GN=PREP PE=1 SV=2	710	80.648	5.86	0	13.8459	0	8.16901	5	11	5	5
P55786	>sp|P55786|PSA_HUMAN Puromycin-sensitive aminopeptidase OS=Homo sapiens GN=NPEPPS PE=1 SV=2	919	103.211	5.72	0	12.2819	0	5.22307	5	11	0	5
P09104-2	>sp|P09104-2|ENOG_HUMAN Isoform 2 of Gamma-enolase OS=Homo sapiens GN=ENO2	391	42.681	5.12	0	12.6276	0	10.2302	2	10	0	2
P09104	>sp|P09104|ENOG_HUMAN Gamma-enolase OS=Homo sapiens GN=ENO2 PE=1 SV=3	434	47.239	5.03	0	12.6276	0	9.21659	2	10	0	2
P62857	>sp|P62857|RS28_HUMAN 40S ribosomal protein S28 OS=Homo sapiens GN=RPS28 PE=1 SV=1	69	7.836	10.7	0	13.5721	0	40.5797	4	10	4	4
P11279	>sp|P11279|LAMP1_HUMAN Lysosome-associated membrane glycoprotein 1 OS=Homo sapiens GN=LAMP1 PE=1 SV=3	417	44.854	8.75	0	11.7269	0	8.63309	3	10	1	3
P30508	>sp|P30508|1C12_HUMAN HLA class I histocompatibility antigen, Cw-12 alpha chain OS=Homo sapiens GN=HLA-C PE=1 SV=2	366	40.86	6.3	0	15.6383	0	17.7596	4	10	0	0
P00390-5	>sp|P00390-5|GSHR_HUMAN Isoform 4 of Glutathione reductase, mitochondrial OS=Homo sapiens GN=GSR	440	47.237	8.75	0	13.1872	0	12.5	4	10	0	4
P00390-4	>sp|P00390-4|GSHR_HUMAN Isoform 3 of Glutathione reductase, mitochondrial OS=Homo sapiens GN=GSR	469	50.465	8.34	0	13.1872	0	11.7271	4	10	0	4
P00390-2	>sp|P00390-2|GSHR_HUMAN Isoform Cytoplasmic of Glutathione reductase, mitochondrial OS=Homo sapiens GN=GSR	479	51.667	7.71	0	13.1872	0	11.4823	4	10	0	4
P00390-3	>sp|P00390-3|GSHR_HUMAN Isoform 2 of Glutathione reductase, mitochondrial OS=Homo sapiens GN=GSR	493	52.993	8.84	0	13.1872	0	11.1562	4	10	0	4
P00390	>sp|P00390|GSHR_HUMAN Glutathione reductase, mitochondrial OS=Homo sapiens GN=GSR PE=1 SV=2	522	56.221	8.5	0	13.1872	0	10.5364	4	10	0	4
Q29963	>sp|Q29963|1C06_HUMAN HLA class I histocompatibility antigen, Cw-6 alpha chain OS=Homo sapiens GN=HLA-C PE=1 SV=2	366	40.943	6	0	16.3182	0	17.7596	4	10	0	0
Q86X55-2	>sp|Q86X55-2|CARM1_HUMAN Isoform 2 of Histone-arginine methyltransferase CARM1 OS=Homo sapiens GN=CARM1	384	41.858	5.96	0	13.8569	0	16.1458	4	10	0	4
P10321	>sp|P10321|1C07_HUMAN HLA class I histocompatibility antigen, Cw-7 alpha chain OS=Homo sapiens GN=HLA-C PE=1 SV=3	366	40.623	6.04	0	16.3182	0	17.7596	4	10	0	0
Q9BT78-2	>sp|Q9BT78-2|CSN4_HUMAN Isoform 2 of COP9 signalosome complex subunit 4 OS=Homo sapiens GN=COPS4	352	40.172	6.95	0	15.1635	0	15.0568	4	10	0	4
Q12792-4	>sp|Q12792-4|TWF1_HUMAN Isoform 4 of Twinfilin-1 OS=Homo sapiens GN=TWF1	252	28.805	7.62	0	11.8626	0	17.8571	3	10	0	3
Q12792	>sp|Q12792|TWF1_HUMAN Twinfilin-1 OS=Homo sapiens GN=TWF1 PE=1 SV=3	350	40.258	6.96	0	11.8626	0	12.8571	3	10	0	3
Q9NRR5	>sp|Q9NRR5|UBQL4_HUMAN Ubiquilin-4 OS=Homo sapiens GN=UBQLN4 PE=1 SV=2	601	63.812	5.22	0	13.0733	0	6.15641	3	9	0	3
P50895	>sp|P50895|BCAM_HUMAN Basal cell adhesion molecule OS=Homo sapiens GN=BCAM PE=1 SV=2	628	67.363	5.81	0	15.3259	0	10.6688	5	9	0	5
Q8NBS9-2	>sp|Q8NBS9-2|TXND5_HUMAN Isoform 2 of Thioredoxin domain-containing protein 5 OS=Homo sapiens GN=TXNDC5	324	36.155	5.47	0	13.8073	0	18.5185	6	9	0	6
Q8NBS9	>sp|Q8NBS9|TXND5_HUMAN Thioredoxin domain-containing protein 5 OS=Homo sapiens GN=TXNDC5 PE=1 SV=2	432	47.599	5.97	0	13.8073	0	13.8889	6	9	0	6
P63104-2	>sp|P63104-2|1433Z_HUMAN Isoform 2 of 14-3-3 protein zeta/delta OS=Homo sapiens GN=YWHAZ	170	19.32	4.81	0	16.636	0	36.4706	5	9	0	5
P04080	>sp|P04080|CYTB_HUMAN Cystatin-B OS=Homo sapiens GN=CSTB PE=1 SV=2	98	11.133	7.56	0	12.0043	0	24.4898	2	8	2	2
P80303	>sp|P80303|NUCB2_HUMAN Nucleobindin-2 OS=Homo sapiens GN=NUCB2 PE=1 SV=2	420	50.164	5.12	0	13.8521	0	13.3333	5	8	0	4
P80303-2	>sp|P80303-2|NUCB2_HUMAN Isoform 2 of Nucleobindin-2 OS=Homo sapiens GN=NUCB2	420	50.169	5.12	0	13.8521	0	13.3333	5	8	0	4
Q9ULA0	>sp|Q9ULA0|DNPEP_HUMAN Aspartyl aminopeptidase OS=Homo sapiens GN=DNPEP PE=1 SV=1	475	52.395	7.42	0	13.8646	0	11.3684	4	8	0	4
P35606-2	>sp|P35606-2|COPB2_HUMAN Isoform 2 of Coatomer subunit beta' OS=Homo sapiens GN=COPB2	877	98.984	5.16	0	11.7306	0	7.29761	5	8	0	5
P35606	>sp|P35606|COPB2_HUMAN Coatomer subunit beta' OS=Homo sapiens GN=COPB2 PE=1 SV=2	906	102.422	5.27	0	11.7306	0	7.06402	5	8	0	5
P01889	>sp|P01889|1B07_HUMAN HLA class I histocompatibility antigen, B-7 alpha chain OS=Homo sapiens GN=HLA-B PE=1 SV=3	362	40.435	5.85	0	12.3651	0	11.326	3	7	0	0
P30460	>sp|P30460|1B08_HUMAN HLA class I histocompatibility antigen, B-8 alpha chain OS=Homo sapiens GN=HLA-B PE=1 SV=1	362	40.306	5.71	0	12.3651	0	11.326	3	7	0	0
P30480	>sp|P30480|1B42_HUMAN HLA class I histocompatibility antigen, B-42 alpha chain OS=Homo sapiens GN=HLA-B PE=1 SV=1	362	40.308	5.85	0	12.3651	0	11.326	3	7	0	0
Q29865	>sp|Q29865|1C18_HUMAN HLA class I histocompatibility antigen, Cw-18 alpha chain OS=Homo sapiens GN=HLA-C PE=1 SV=1	366	40.907	6.62	0	12.3651	0	11.2022	3	7	0	0
P00505	>sp|P00505|AATM_HUMAN Aspartate aminotransferase, mitochondrial OS=Homo sapiens GN=GOT2 PE=1 SV=3	430	47.487	9.01	0	11.8649	0	13.4884	4	7	2	4
O75369-2	>sp|O75369-2|FLNB_HUMAN Isoform 2 of Filamin-B OS=Homo sapiens GN=FLNB	2578	275.496	5.78	0	555.817	0	66.0202	130	492	0	122		0	308.79	0	48.526	89	289	0	85
O75369-9	>sp|O75369-9|FLNB_HUMAN Isoform 9 of Filamin-B OS=Homo sapiens GN=FLNB	2591	276.765	5.71	0	555.817	0	65.6889	130	492	0	122		0	308.79	0	48.2825	89	289	0	85
O75369	>sp|O75369|FLNB_HUMAN Filamin-B OS=Homo sapiens GN=FLNB PE=1 SV=2	2602	277.99	5.73	0	555.817	0	65.4112	130	492	0	122		0	308.79	0	48.0784	89	289	0	85
O75369-8	>sp|O75369-8|FLNB_HUMAN Isoform 8 of Filamin-B OS=Homo sapiens GN=FLNB	2633	281.459	5.71	0	552.666	0	63.3878	129	489	0	121		0	308.79	0	47.5123	89	289	0	85
O75369-6	>sp|O75369-6|FLNB_HUMAN Isoform 6 of Filamin-B OS=Homo sapiens GN=FLNB	2537	271.244	5.72	0	539.073	0	65.1557	127	477	0	119		0	299.66	0	47.3788	86	281	0	82
O75369-3	>sp|O75369-3|FLNB_HUMAN Isoform 3 of Filamin-B OS=Homo sapiens GN=FLNB	2561	273.738	5.67	0	539.073	0	64.5451	127	477	0	119		0	299.66	0	46.9348	86	281	0	82
O75369-7	>sp|O75369-7|FLNB_HUMAN Isoform 7 of Filamin-B OS=Homo sapiens GN=FLNB	2422	257.39	5.64	0	520.56	0	65.6069	118	458	0	117		0	287.63	0	47.6879	81	264	0	81
O75369-5	>sp|O75369-5|FLNB_HUMAN Isoform 5 of Filamin-B OS=Homo sapiens GN=FLNB	2146	230.145	5.54	0	468.549	0	63.8863	106	415	0	99		0	259.4	0	47.4371	75	246	0	71
O75369-4	>sp|O75369-4|FLNB_HUMAN Isoform 4 of Filamin-B OS=Homo sapiens GN=FLNB	2150	230.643	5.54	0	468.549	0	63.7674	106	415	0	99		0	259.4	0	47.3488	75	246	0	71
O43707	>sp|O43707|ACTN4_HUMAN Alpha-actinin-4 OS=Homo sapiens GN=ACTN4 PE=1 SV=2	911	104.788	5.44	0	407	0	74.4237	71	399	3	49		0	239.485	0	66.3008	58	230	3	37
P49327	>sp|P49327|FAS_HUMAN Fatty acid synthase OS=Homo sapiens GN=FASN PE=1 SV=3	2511	273.254	6.44	0	397.674	0	49.8208	95	349	1	95	Acetyl [N-Term]	0	225.111	0	37.037	67	214	1	67	Acetyl [N-Term]
P58107	>sp|P58107|EPIPL_HUMAN Epiplakin OS=Homo sapiens GN=EPPK1 PE=1 SV=2	5090	555.279	5.6	0	386.37	0	61.4735	99	336	2	2		0	230.566	0	50.5894	63	209	1	1
O43707-2	>sp|O43707-2|ACTN4_HUMAN Isoform ACTN4ISO of Alpha-actinin-4 OS=Homo sapiens GN=ACTN4	692	79.864	5.17	0	294.999	0	72.8324	53	296	0	38		0	175.961	0	62.4277	42	169	0	28
P12814	>sp|P12814|ACTN1_HUMAN Alpha-actinin-1 OS=Homo sapiens GN=ACTN1 PE=1 SV=2	892	102.993	5.41	0	341.177	0	72.7578	62	335	1	40		0	227.07	0	70.4036	56	210	1	35
P12814-3	>sp|P12814-3|ACTN1_HUMAN Isoform 3 of Alpha-actinin-1 OS=Homo sapiens GN=ACTN1	914	105.502	5.41	0	332.57	0	68.5996	61	329	0	39		0	220.156	0	66.302	55	206	0	34
P12814-2	>sp|P12814-2|ACTN1_HUMAN Isoform 2 of Alpha-actinin-1 OS=Homo sapiens GN=ACTN1	887	102.644	5.5	0	329.46	0	69.3348	60	326	0	38		0	217.074	0	66.0654	54	203	0	33
P12814-4	>sp|P12814-4|ACTN1_HUMAN Isoform 4 of Alpha-actinin-1 OS=Homo sapiens GN=ACTN1	930	107.074	5.58	0	319.312	0	64.4086	58	319	0	36		0	212.84	0	61.2903	53	198	0	32
P11021	>sp|P11021|GRP78_HUMAN 78 kDa glucose-regulated protein OS=Homo sapiens GN=HSPA5 PE=1 SV=2	654	72.288	5.16	0	256.169	0	57.0336	43	291	40	41		0	181.707	0	54.2813	37	196	34	35
O43707-3	>sp|O43707-3|ACTN4_HUMAN Isoform 3 of Alpha-actinin-4 OS=Homo sapiens GN=ACTN4	521	59.542	4.94	0	215.187	0	69.0979	39	222	0	32		0	129.512	0	62.1881	32	128	0	24
P06737-2	>sp|P06737-2|PYGL_HUMAN Isoform 2 of Glycogen phosphorylase, liver form OS=Homo sapiens GN=PYGL	813	93.075	7.3	0	182.909	0	62.9766	49	198	0	40		0	110.054	0	43.7884	36	109	0	28
P06737	>sp|P06737|PYGL_HUMAN Glycogen phosphorylase, liver form OS=Homo sapiens GN=PYGL PE=1 SV=4	847	97.087	7.17	0	182.909	0	60.4486	49	198	0	40		0	110.054	0	42.0307	36	109	0	28
P21333-2	>sp|P21333-2|FLNA_HUMAN Isoform 2 of Filamin-A OS=Homo sapiens GN=FLNA	2639	279.843	6.05	0	119.095	0	23.4559	44	118	0	36		0	50.9619	0	10.2311	21	46	0	17
P21333	>sp|P21333|FLNA_HUMAN Filamin-A OS=Homo sapiens GN=FLNA PE=1 SV=4	2647	280.564	6.06	0	119.095	0	23.385	44	118	0	36		0	50.9619	0	10.2002	21	46	0	17
P11142	>sp|P11142|HSP7C_HUMAN Heat shock cognate 71 kDa protein OS=Homo sapiens GN=HSPA8 PE=1 SV=1	646	70.854	5.52	0	186.91	0	55.7276	35	209	0	30		0	144.674	0	52.9412	31	142	0	26
P16144-4	>sp|P16144-4|ITB4_HUMAN Isoform Beta-4D of Integrin beta-4 OS=Homo sapiens GN=ITGB4	1745	194.342	6.13	0	107.588	0	25.5587	33	91	0	33		0	30.1633	0	9.45559	13	28	0	13
P16144-2	>sp|P16144-2|ITB4_HUMAN Isoform Beta-4A of Integrin beta-4 OS=Homo sapiens GN=ITGB4	1752	194.889	6.1	0	107.588	0	25.4566	33	91	0	33		0	30.1633	0	9.41781	13	28	0	13
P16144	>sp|P16144|ITB4_HUMAN Integrin beta-4 OS=Homo sapiens GN=ITGB4 PE=1 SV=5	1822	202.039	6.09	0	107.588	0	24.4786	33	91	0	33		0	30.1633	0	9.05598	13	28	0	13
Q9Y490	>sp|Q9Y490|TLN1_HUMAN Talin-1 OS=Homo sapiens GN=TLN1 PE=1 SV=3	2541	269.599	6.07	0	91.9732	0	16.4896	29	76	27	29		0	18.4937	0	4.60449	8	14	7	8
P11216	>sp|P11216|PYGB_HUMAN Glycogen phosphorylase, brain form OS=Homo sapiens GN=PYGB PE=1 SV=5	843	96.635	6.86	0	124.314	0	44.6026	36	126	20	27		0	67.6602	0	30.4864	23	65	13	15
P16144-3	>sp|P16144-3|ITB4_HUMAN Isoform Beta-4B of Integrin beta-4 OS=Homo sapiens GN=ITGB4	1805	200.597	6.3	0	104.119	0	23.9335	32	88	0	32		0	30.1633	0	9.14127	13	28	0	13
P15924	>sp|P15924|DESP_HUMAN Desmoplakin OS=Homo sapiens GN=DSP PE=1 SV=3	2871	331.569	6.81	0	137.03	0	19.5751	47	141	9	47		0	85.7652	0	12.2257	29	84	2	29
P0DMV9	>sp|P0DMV9|HS71B_HUMAN Heat shock 70 kDa protein 1B OS=Homo sapiens GN=HSPA1B PE=1 SV=1;>sp|P0DMV8|HS71A_HUMAN Heat shock 70 kDa protein 1A OS=Homo sapiens GN=HSPA1A PE=1 SV=1	641	70.009	5.66	0	147.887	0	59.1264	32	149	0	28		0	100.547	0	43.6817	25	98	0	21
P11142-2	>sp|P11142-2|HSP7C_HUMAN Isoform 2 of Heat shock cognate 71 kDa protein OS=Homo sapiens GN=HSPA8	493	53.484	5.86	0	159.163	0	59.6349	28	171	0	25		0	118.35	0	59.2292	25	121	0	22
P08238	>sp|P08238|HS90B_HUMAN Heat shock protein HSP 90-beta OS=Homo sapiens GN=HSP90AB1 PE=1 SV=4	724	83.212	5.03	0	124.334	0	50	33	113	10	18		0	64.9765	0	34.9448	22	65	7	12
P29401	>sp|P29401|TKT_HUMAN Transketolase OS=Homo sapiens GN=TKT PE=1 SV=3	623	67.835	7.66	0	94.4384	0	45.1043	24	95	0	24		0	53.5463	0	37.0787	18	47	0	18
P29401-2	>sp|P29401-2|TKT_HUMAN Isoform 2 of Transketolase OS=Homo sapiens GN=TKT	631	68.77	7.52	0	94.4384	0	44.5325	24	95	0	24		0	53.5463	0	36.6086	18	47	0	18
P38646	>sp|P38646|GRP75_HUMAN Stress-70 protein, mitochondrial OS=Homo sapiens GN=HSPA9 PE=1 SV=2	679	73.635	6.16	0	128.727	0	46.8336	28	119	14	28		0	63.0325	0	35.4934	20	72	9	20
P22314-2	>sp|P22314-2|UBA1_HUMAN Isoform 2 of Ubiquitin-like modifier-activating enzyme 1 OS=Homo sapiens GN=UBA1	1018	113.728	5.6	0	159.305	0	45.0884	33	134	0	33		0	96.0796	0	32.8094	24	89	0	24
P22314	>sp|P22314|UBA1_HUMAN Ubiquitin-like modifier-activating enzyme 1 OS=Homo sapiens GN=UBA1 PE=1 SV=3	1058	117.774	5.76	0	159.305	0	43.3837	33	134	0	33		0	96.0796	0	31.569	24	89	0	24
Q14247	>sp|Q14247|SRC8_HUMAN Src substrate cortactin OS=Homo sapiens GN=CTTN PE=1 SV=2	550	61.549	5.4	0	87.3438	0	47.4545	27	85	3	27		0	41.0851	0	30.1818	15	42	1	15
P10809	>sp|P10809|CH60_HUMAN 60 kDa heat shock protein, mitochondrial OS=Homo sapiens GN=HSPD1 PE=1 SV=2	573	61.016	5.87	0	176.234	0	70.8551	40	154	28	40		0	117.017	0	64.9215	35	112	25	35
P35221	>sp|P35221|CTNA1_HUMAN Catenin alpha-1 OS=Homo sapiens GN=CTNNA1 PE=1 SV=1	906	100.009	6.29	0	85.2344	0	36.8653	24	72	0	24		0	28.0801	0	15.4525	10	30	0	10
P35221-2	>sp|P35221-2|CTNA1_HUMAN Isoform 2 of Catenin alpha-1 OS=Homo sapiens GN=CTNNA1	930	102.571	6.34	0	85.2344	0	35.914	24	72	0	24		0	28.0801	0	15.0538	10	30	0	10
Q14697	>sp|Q14697|GANAB_HUMAN Neutral alpha-glucosidase AB OS=Homo sapiens GN=GANAB PE=1 SV=3	944	106.807	6.14	0	152.693	0	46.5042	38	138	0	38		0	101.672	0	39.089	30	97	0	30
Q14697-2	>sp|Q14697-2|GANAB_HUMAN Isoform 2 of Neutral alpha-glucosidase AB OS=Homo sapiens GN=GANAB	966	109.369	6.24	0	148.189	0	44.824	37	135	0	37		0	97.5546	0	37.5776	29	94	0	29
P15924-3	>sp|P15924-3|DESP_HUMAN Isoform DSPIa of Desmoplakin OS=Homo sapiens GN=DSP	2428	278.742	6.95	0	115.083	0	19.1104	38	116	0	38		0	77.6088	0	13.5914	27	75	0	27
P00533	>sp|P00533|EGFR_HUMAN Epidermal growth factor receptor OS=Homo sapiens GN=EGFR PE=1 SV=2	1210	134.19	6.68	0	78.4889	0	25.2066	21	65	0	21		0	29.7364	0	10.4132	10	25	0	10
P06733	>sp|P06733|ENOA_HUMAN Alpha-enolase OS=Homo sapiens GN=ENO1 PE=1 SV=2	434	47.139	7.39	0	120.176	0	69.1244	26	100	0	26		0	67.0859	0	54.1475	17	61	0	17
Q14247-3	>sp|Q14247-3|SRC8_HUMAN Isoform 3 of Src substrate cortactin OS=Homo sapiens GN=CTTN	513	57.432	5.33	0	81.1564	0	46.9786	24	78	0	24		0	39.3362	0	30.9942	14	39	0	14
P0DMV8-2	>sp|P0DMV8-2|HS71A_HUMAN Isoform 2 of Heat shock 70 kDa protein 1A OS=Homo sapiens GN=HSPA1A	586	63.898	5.71	0	124.971	0	53.2423	27	122	0	23		0	88.4122	0	38.7372	21	84	0	17
P15924-2	>sp|P15924-2|DESP_HUMAN Isoform DPII of Desmoplakin OS=Homo sapiens GN=DSP	2272	259.957	6.96	0	110.59	0	19.3662	36	110	0	36		0	76.0812	0	14.0405	26	73	0	26
P35609	>sp|P35609|ACTN2_HUMAN Alpha-actinin-2 OS=Homo sapiens GN=ACTN2 PE=1 SV=1	894	103.788	5.45	0	108.423	0	18.9038	19	96	0	0		0	69.119	0	18.0089	18	59	0	0
P35609-2	>sp|P35609-2|ACTN2_HUMAN Isoform 2 of Alpha-actinin-2 OS=Homo sapiens GN=ACTN2	894	103.854	5.52	0	108.423	0	18.9038	19	96	0	0		0	69.119	0	18.0089	18	59	0	0
Q92598-2	>sp|Q92598-2|HS105_HUMAN Isoform Beta of Heat shock protein 105 kDa OS=Homo sapiens GN=HSPH1	814	92.057	5.55	0	50.7152	0	23.8329	15	44	0	15		0	10.6662	0	5.65111	4	7	0	4
Q92598-3	>sp|Q92598-3|HS105_HUMAN Isoform 3 of Heat shock protein 105 kDa OS=Homo sapiens GN=HSPH1	817	92.196	5.4	0	50.7152	0	23.7454	15	44	0	15		0	10.6662	0	5.63035	4	7	0	4
Q92598	>sp|Q92598|HS105_HUMAN Heat shock protein 105 kDa OS=Homo sapiens GN=HSPH1 PE=1 SV=1	858	96.804	5.39	0	50.7152	0	22.6107	15	44	0	15		0	10.6662	0	5.36131	4	7	0	4
Q01518	>sp|Q01518|CAP1_HUMAN Adenylyl cyclase-associated protein 1 OS=Homo sapiens GN=CAP1 PE=1 SV=5	475	51.869	8.06	0	55.7438	0	40.2105	16	55	0	16		0	20.4008	0	20.2105	9	19	0	9
P68032	>sp|P68032|ACTC_HUMAN Actin, alpha cardiac muscle 1 OS=Homo sapiens GN=ACTC1 PE=1 SV=1	377	41.992	5.39	0	63.1474	0	32.0955	13	83	0	1		0	45.2156	0	29.9735	11	48	0	1
P68133	>sp|P68133|ACTS_HUMAN Actin, alpha skeletal muscle OS=Homo sapiens GN=ACTA1 PE=1 SV=1	377	42.024	5.39	0	63.1474	0	32.0955	13	83	0	1		0	45.2156	0	29.9735	11	48	0	1
Q14247-2	>sp|Q14247-2|SRC8_HUMAN Isoform 2 of Src substrate cortactin OS=Homo sapiens GN=CTTN	634	70.915	6.64	0	74.9016	0	35.9621	22	72	0	22		0	36.1306	0	23.1861	13	37	0	13
P07437	>sp|P07437|TBB5_HUMAN Tubulin beta chain OS=Homo sapiens GN=TUBB PE=1 SV=2	444	49.639	4.89	0	112.063	0	65.5405	22	126	1	4		0	89.5465	0	61.9369	20	92	1	5
P63267	>sp|P63267|ACTH_HUMAN Actin, gamma-enteric smooth muscle OS=Homo sapiens GN=ACTG2 PE=1 SV=1	376	41.85	5.48	0	59.4689	0	29.2553	12	76	0	1		0	39.7006	0	27.1277	10	42	0	1
P62736	>sp|P62736|ACTA_HUMAN Actin, aortic smooth muscle OS=Homo sapiens GN=ACTA2 PE=1 SV=1	377	41.982	5.39	0	59.4689	0	29.1777	12	76	0	1		0	39.7006	0	27.0557	10	42	0	1
Q92598-4	>sp|Q92598-4|HS105_HUMAN Isoform 4 of Heat shock protein 105 kDa OS=Homo sapiens GN=HSPH1	860	97.398	5.72	0	47.0804	0	20.9302	14	41	0	14		0	10.6662	0	5.34884	4	7	0	4
Q86Y46	>sp|Q86Y46|K2C73_HUMAN Keratin, type II cytoskeletal 73 OS=Homo sapiens GN=KRT73 PE=1 SV=1	540	58.887	7.23	0	32.8116	0	15.1852	9	60	0	4		0	22.2169	0	8.33333	7	27	0	0
P31948	>sp|P31948|STIP1_HUMAN Stress-induced-phosphoprotein 1 OS=Homo sapiens GN=STIP1 PE=1 SV=1	543	62.599	6.8	0	74.3637	0	41.8048	22	65	0	22	Acetyl [N-Term]	0	29.538	0	20.9945	11	33	0	11
P31948-3	>sp|P31948-3|STIP1_HUMAN Isoform 3 of Stress-induced-phosphoprotein 1 OS=Homo sapiens GN=STIP1	519	59.74	6.8	0	71.4609	0	42.0039	21	62	0	21	Acetyl [N-Term]	0	26.6921	0	20.2312	10	30	0	10
Q99798	>sp|Q99798|ACON_HUMAN Aconitate hydratase, mitochondrial OS=Homo sapiens GN=ACO2 PE=1 SV=2	780	85.372	7.61	0	54.8466	0	27.0513	16	51	0	16		0	20.4795	0	11.9231	7	19	0	7
Q86Y46-2	>sp|Q86Y46-2|K2C73_HUMAN Isoform 2 of Keratin, type II cytoskeletal 73 OS=Homo sapiens GN=KRT73	381	41.959	8.25	0	26.9888	0	19.1601	7	52	0	4		0	16.3166	0	9.44882	5	20	0	0
P07237	>sp|P07237|PDIA1_HUMAN Protein disulfide-isomerase OS=Homo sapiens GN=P4HB PE=1 SV=3	508	57.081	4.87	0	71.2217	0	48.4252	22	73	0	22		0	51.1787	0	43.8976	17	42	0	17
P30101	>sp|P30101|PDIA3_HUMAN Protein disulfide-isomerase A3 OS=Homo sapiens GN=PDIA3 PE=1 SV=4	505	56.747	6.35	0	81.1048	0	44.1584	21	73	18	18		0	47.5106	0	33.2673	15	42	14	14
P14314-2	>sp|P14314-2|GLU2B_HUMAN Isoform 2 of Glucosidase 2 subunit beta OS=Homo sapiens GN=PRKCSH	525	59.141	4.42	0	58.2559	0	35.0476	16	56	0	16		0	29.1828	0	23.0476	11	25	0	11
P14314	>sp|P14314|GLU2B_HUMAN Glucosidase 2 subunit beta OS=Homo sapiens GN=PRKCSH PE=1 SV=2	528	59.388	4.41	0	58.2559	0	34.8485	16	56	0	16		0	29.1828	0	22.9167	11	25	0	11
P18206-2	>sp|P18206-2|VINC_HUMAN Isoform 1 of Vinculin OS=Homo sapiens GN=VCL	1066	116.649	6.09	0	51.2224	0	21.6698	19	49	0	19		0	18.18	0	9.28705	7	18	0	7
P18206	>sp|P18206|VINC_HUMAN Vinculin OS=Homo sapiens GN=VCL PE=1 SV=4	1134	123.722	5.66	0	51.2224	0	20.3704	19	49	0	19		0	18.18	0	8.73016	7	18	0	7
P31948-2	>sp|P31948-2|STIP1_HUMAN Isoform 2 of Stress-induced-phosphoprotein 1 OS=Homo sapiens GN=STIP1	590	68.037	7.74	0	70.7197	0	36.7797	21	63	0	21		0	29.538	0	19.322	11	33	0	11
P06753-2	>sp|P06753-2|TPM3_HUMAN Isoform 2 of Tropomyosin alpha-3 chain OS=Homo sapiens GN=TPM3	248	29.015	4.78	0	48.6028	0	45.9677	16	45	0	9		0	21.7802	0	35.0806	8	15	0	4
P06753-5	>sp|P06753-5|TPM3_HUMAN Isoform 5 of Tropomyosin alpha-3 chain OS=Homo sapiens GN=TPM3	248	28.853	4.75	0	48.6028	0	45.9677	16	45	0	9		0	21.7802	0	35.0806	8	15	0	4
P50990	>sp|P50990|TCPQ_HUMAN T-complex protein 1 subunit theta OS=Homo sapiens GN=CCT8 PE=1 SV=4	548	59.583	5.6	0	65.0326	0	43.4307	21	55	1	21		0	28.9645	0	20.6204	10	26	0	10
Q01518-2	>sp|Q01518-2|CAP1_HUMAN Isoform 2 of Adenylyl cyclase-associated protein 1 OS=Homo sapiens GN=CAP1	474	51.798	8.06	0	51.1296	0	35.443	15	48	0	15		0	20.4008	0	20.2532	9	19	0	9
P07355	>sp|P07355|ANXA2_HUMAN Annexin A2 OS=Homo sapiens GN=ANXA2 PE=1 SV=2	339	38.58	7.75	0	82.1257	0	56.6372	22	74	0	22		0	51.8044	0	49.5575	15	46	0	15
P07355-2	>sp|P07355-2|ANXA2_HUMAN Isoform 2 of Annexin A2 OS=Homo sapiens GN=ANXA2	357	40.386	8.37	0	82.1257	0	53.7815	22	74	0	22		0	51.8044	0	47.0588	15	46	0	15
P06753-3	>sp|P06753-3|TPM3_HUMAN Isoform 3 of Tropomyosin alpha-3 chain OS=Homo sapiens GN=TPM3	247	28.938	4.81	0	43.8779	0	42.1053	14	40	0	7		0	18.6286	0	31.1741	7	12	0	3
P06753-4	>sp|P06753-4|TPM3_HUMAN Isoform 4 of Tropomyosin alpha-3 chain OS=Homo sapiens GN=TPM3	247	28.776	4.77	0	43.8779	0	42.1053	14	40	0	7		0	18.6286	0	31.1741	7	12	0	3
P06753-6	>sp|P06753-6|TPM3_HUMAN Isoform 6 of Tropomyosin alpha-3 chain OS=Homo sapiens GN=TPM3	248	28.905	4.75	0	43.8779	0	41.9355	14	40	0	7		0	18.6286	0	31.0484	7	12	0	3
P00533-4	>sp|P00533-4|EGFR_HUMAN Isoform 4 of Epidermal growth factor receptor OS=Homo sapiens GN=EGFR	628	69.182	7.05	0	47.3612	0	25.7962	12	38	0	12		0	13.7443	0	9.55414	5	10	0	5
P00533-3	>sp|P00533-3|EGFR_HUMAN Isoform 3 of Epidermal growth factor receptor OS=Homo sapiens GN=EGFR	705	77.261	6.96	0	47.3612	0	22.9787	12	38	0	12		0	13.7443	0	8.51064	5	10	0	5
P23229-4	>sp|P23229-4|ITA6_HUMAN Isoform Alpha-6X2A of Integrin alpha-6 OS=Homo sapiens GN=ITGA6	1068	119.014	7.27	0	46.3527	0	18.4457	15	37	0	15		0	13.2828	0	7.02247	5	9	0	5
P23229-2	>sp|P23229-2|ITA6_HUMAN Isoform Alpha-6X1A of Integrin alpha-6 OS=Homo sapiens GN=ITGA6	1073	119.402	6.77	0	46.3527	0	18.3597	15	37	0	15		0	13.2828	0	6.98975	5	9	0	5
P23229-5	>sp|P23229-5|ITA6_HUMAN Isoform Alpha-6X2B of Integrin alpha-6 OS=Homo sapiens GN=ITGA6	1086	121.589	7.36	0	46.3527	0	18.14	15	37	0	15		0	13.2828	0	6.90608	5	9	0	5
P23229-3	>sp|P23229-3|ITA6_HUMAN Isoform Alpha-6X1B of Integrin alpha-6 OS=Homo sapiens GN=ITGA6	1091	121.977	6.8	0	46.3527	0	18.0568	15	37	0	15		0	13.2828	0	6.87443	5	9	0	5
P23229-9	>sp|P23229-9|ITA6_HUMAN Isoform 9 of Integrin alpha-6 OS=Homo sapiens GN=ITGA6	1097	122.281	6.68	0	46.3527	0	17.9581	15	37	0	15		0	13.2828	0	6.83683	5	9	0	5
P23229-6	>sp|P23229-6|ITA6_HUMAN Isoform Alpha-6X1X2A of Integrin alpha-6 OS=Homo sapiens GN=ITGA6	1112	123.951	6.61	0	46.3527	0	17.7158	15	37	0	15		0	13.2828	0	6.7446	5	9	0	5
P23229	>sp|P23229|ITA6_HUMAN Integrin alpha-6 OS=Homo sapiens GN=ITGA6 PE=1 SV=5	1130	126.526	6.61	0	46.3527	0	17.4336	15	37	0	15		0	13.2828	0	6.63717	5	9	0	5
O15067	>sp|O15067|PUR4_HUMAN Phosphoribosylformylglycinamidine synthase OS=Homo sapiens GN=PFAS PE=1 SV=4	1338	144.643	5.76	0	36.3929	0	11.5845	12	34	7	12		0	10.3678	0	3.73692	4	6	3	4
Q08043	>sp|Q08043|ACTN3_HUMAN Alpha-actinin-3 OS=Homo sapiens GN=ACTN3 PE=1 SV=2	901	103.176	5.52	0	61.9408	0	13.0966	13	57	0	0		0	37.9797	0	12.2087	12	30	0	0
P35221-3	>sp|P35221-3|CTNA1_HUMAN Isoform 3 of Catenin alpha-1 OS=Homo sapiens GN=CTNNA1	536	59.512	5.6	0	46.5444	0	34.3284	13	37	0	13		0	10.425	0	9.70149	4	10	0	4
O00151	>sp|O00151|PDLI1_HUMAN PDZ and LIM domain protein 1 OS=Homo sapiens GN=PDLIM1 PE=1 SV=4	329	36.049	7.02	0	49.9574	0	60.4863	13	41	13	13		0	17.3078	0	39.5137	7	15	7	7
P04406-2	>sp|P04406-2|G3P_HUMAN Isoform 2 of Glyceraldehyde-3-phosphate dehydrogenase OS=Homo sapiens GN=GAPDH	293	31.528	7.61	0	100.497	0	79.1809	17	100	0	17		0	66.1494	0	66.2116	14	75	0	14
P68366-2	>sp|P68366-2|TBA4A_HUMAN Isoform 2 of Tubulin alpha-4A chain OS=Homo sapiens GN=TUBA4A	433	48.298	5.01	0	81.8974	0	53.5797	16	78	0	6		0	56.7731	0	48.4988	13	53	0	4
P68366	>sp|P68366|TBA4A_HUMAN Tubulin alpha-4A chain OS=Homo sapiens GN=TUBA4A PE=1 SV=1	448	49.892	5.06	0	81.8974	0	51.7857	16	78	0	6		0	56.7731	0	46.875	13	53	0	4
P05023-3	>sp|P05023-3|AT1A1_HUMAN Isoform 3 of Sodium/potassium-transporting ATPase subunit alpha-1 OS=Homo sapiens GN=ATP1A1	992	109.48	5.31	0	50.3303	0	20.9677	17	45	0	11		0	23.3216	0	9.67742	8	20	0	8
P05023	>sp|P05023|AT1A1_HUMAN Sodium/potassium-transporting ATPase subunit alpha-1 OS=Homo sapiens GN=ATP1A1 PE=1 SV=1	1023	112.824	5.49	0	50.3303	0	20.3324	17	45	0	11		0	23.3216	0	9.38416	8	20	0	8
P05023-4	>sp|P05023-4|AT1A1_HUMAN Isoform 4 of Sodium/potassium-transporting ATPase subunit alpha-1 OS=Homo sapiens GN=ATP1A1	1023	112.928	5.49	0	50.3303	0	20.3324	17	45	0	11		0	23.3216	0	9.38416	8	20	0	8
P31153	>sp|P31153|METK2_HUMAN S-adenosylmethionine synthase isoform type-2 OS=Homo sapiens GN=MAT2A PE=1 SV=1	395	43.633	6.48	0	32.5766	0	28.3544	11	33	3	11		0	10.4966	0	12.4051	4	8	0	4
P04406	>sp|P04406|G3P_HUMAN Glyceraldehyde-3-phosphate dehydrogenase OS=Homo sapiens GN=GAPDH PE=1 SV=3	335	36.03	8.46	0	104.841	0	71.6418	18	108	1	18		0	71.1132	0	60.2985	15	84	1	15
Q13885	>sp|Q13885|TBB2A_HUMAN Tubulin beta-2A chain OS=Homo sapiens GN=TUBB2A PE=1 SV=1	445	49.875	4.89	0	80.6812	0	41.3483	16	91	0	1		0	64.1707	0	44.9438	15	67	0	0
Q9BVA1	>sp|Q9BVA1|TBB2B_HUMAN Tubulin beta-2B chain OS=Homo sapiens GN=TUBB2B PE=1 SV=1	445	49.921	4.89	0	80.6812	0	41.3483	16	91	0	1		0	64.1707	0	44.9438	15	67	0	0
P07900	>sp|P07900|HS90A_HUMAN Heat shock protein HSP 90-alpha OS=Homo sapiens GN=HSP90AA1 PE=1 SV=5	732	84.607	5.02	0	69.7047	0	27.3224	21	67	0	8		0	40.2018	0	24.3169	16	43	0	8
P07900-2	>sp|P07900-2|HS90A_HUMAN Isoform 2 of Heat shock protein HSP 90-alpha OS=Homo sapiens GN=HSP90AA1	854	98.099	5.16	0	69.7047	0	23.4192	21	67	0	8		0	40.2018	0	20.8431	16	43	0	8
P48506	>sp|P48506|GSH1_HUMAN Glutamate--cysteine ligase catalytic subunit OS=Homo sapiens GN=GCLC PE=1 SV=2	637	72.719	6.09	0	40.0472	0	18.3673	12	34	0	12		0	9.76535	0	6.90738	4	10	0	4
P68371	>sp|P68371|TBB4B_HUMAN Tubulin beta-4B chain OS=Homo sapiens GN=TUBB4B PE=1 SV=1	445	49.799	4.89	0	96.1095	0	62.0225	21	104	1	3		0	77.9628	0	61.7978	20	81	1	2
P04075	>sp|P04075|ALDOA_HUMAN Fructose-bisphosphate aldolase A OS=Homo sapiens GN=ALDOA PE=1 SV=2	364	39.395	8.09	0	66.6907	0	58.5165	18	63	0	16		0	43.1978	0	43.4066	14	40	0	14
P04075-2	>sp|P04075-2|ALDOA_HUMAN Isoform 2 of Fructose-bisphosphate aldolase A OS=Homo sapiens GN=ALDOA	418	45.232	8.25	0	66.6907	0	50.9569	18	63	0	16		0	43.1978	0	37.799	14	40	0	14
Q13509	>sp|Q13509|TBB3_HUMAN Tubulin beta-3 chain OS=Homo sapiens GN=TUBB3 PE=1 SV=2	450	50.4	4.93	0	61.1947	0	24.4444	12	65	0	1		0	41.1777	0	27.3333	11	42	0	0
Q12931-2	>sp|Q12931-2|TRAP1_HUMAN Isoform 2 of Heat shock protein 75 kDa, mitochondrial OS=Homo sapiens GN=TRAP1	651	74.221	7.87	0	69.3572	0	39.4777	20	60	0	19		0	37.0799	0	24.1167	12	37	0	11
Q12931	>sp|Q12931|TRAP1_HUMAN Heat shock protein 75 kDa, mitochondrial OS=Homo sapiens GN=TRAP1 PE=1 SV=3	704	80.06	8.21	0	69.3572	0	36.5057	20	60	0	19		0	37.0799	0	22.3011	12	37	0	11
P06753	>sp|P06753|TPM3_HUMAN Tropomyosin alpha-3 chain OS=Homo sapiens GN=TPM3 PE=1 SV=2	285	32.93	4.72	0	32.5277	0	30.1754	11	35	0	0		0	18.4679	0	27.3684	7	12	0	0
P34931	>sp|P34931|HS71L_HUMAN Heat shock 70 kDa protein 1-like OS=Homo sapiens GN=HSPA1L PE=1 SV=2	641	70.331	6.02	0	63.2091	0	24.649	11	66	0	0		0	50.1716	0	18.8768	10	44	0	0
Q58FF7	>sp|Q58FF7|H90B3_HUMAN Putative heat shock protein HSP 90-beta-3 OS=Homo sapiens GN=HSP90AB3P PE=5 SV=1	597	68.282	4.79	0	38.553	0	16.9179	12	40	0	5		0	15.3403	0	11.3903	6	18	0	3
P06733-2	>sp|P06733-2|ENOA_HUMAN Isoform MBP-1 of Alpha-enolase OS=Homo sapiens GN=ENO1	341	36.905	6.28	0	83.1964	0	67.7419	17	69	0	17		0	53.618	0	56.0117	13	48	0	13
A6NMY6	>sp|A6NMY6|AXA2L_HUMAN Putative annexin A2-like protein OS=Homo sapiens GN=ANXA2P2 PE=5 SV=2	339	38.635	6.95	0	58.773	0	41.8879	16	54	0	16		0	37.8654	0	35.3982	11	33	0	11
P78371-2	>sp|P78371-2|TCPB_HUMAN Isoform 2 of T-complex protein 1 subunit beta OS=Homo sapiens GN=CCT2	488	52.685	6.44	0	57.761	0	41.1885	15	49	0	15		0	30.1811	0	29.5082	11	28	0	11
P30086	>sp|P30086|PEBP1_HUMAN Phosphatidylethanolamine-binding protein 1 OS=Homo sapiens GN=PEBP1 PE=1 SV=3	187	21.044	7.53	0	40.9878	0	68.984	10	34	10	10		0	20.3182	0	59.3583	7	13	7	7
P23229-7	>sp|P23229-7|ITA6_HUMAN Isoform 7 of Integrin alpha-6 OS=Homo sapiens GN=ITGA6	954	106.51	7.66	0	38.1361	0	17.7149	12	30	0	12		0	13.2828	0	7.86164	5	9	0	5
P49588	>sp|P49588|SYAC_HUMAN Alanine--tRNA ligase, cytoplasmic OS=Homo sapiens GN=AARS PE=1 SV=2	968	106.743	5.53	0	35.5141	0	16.8388	13	32	2	13	Acetyl [N-Term]	0	11.324	0	5.78512	5	11	1	5
P68363	>sp|P68363|TBA1B_HUMAN Tubulin alpha-1B chain OS=Homo sapiens GN=TUBA1B PE=1 SV=1	451	50.12	5.06	0	89.7169	0	53.4368	17	87	0	0		0	68.4546	0	55.2106	16	67	0	0
Q9BQE3	>sp|Q9BQE3|TBA1C_HUMAN Tubulin alpha-1C chain OS=Homo sapiens GN=TUBA1C PE=1 SV=1	449	49.863	5.1	0	84.1179	0	53.6748	17	83	0	7		0	64.4325	0	50.1114	15	63	0	6
Q71U36-2	>sp|Q71U36-2|TBA1A_HUMAN Isoform 2 of Tubulin alpha-1A chain OS=Homo sapiens GN=TUBA1A	416	46.268	5.08	0	84.6652	0	54.5673	16	81	0	0		0	62.7485	0	56.4904	15	61	0	0
Q71U36	>sp|Q71U36|TBA1A_HUMAN Tubulin alpha-1A chain OS=Homo sapiens GN=TUBA1A PE=1 SV=1	451	50.104	5.06	0	84.6652	0	50.3326	16	81	0	0		0	62.7485	0	52.1064	15	61	0	0
P68363-2	>sp|P68363-2|TBA1B_HUMAN Isoform 2 of Tubulin alpha-1B chain OS=Homo sapiens GN=TUBA1B	335	37.194	4.98	0	82.756	0	65.0746	15	78	0	0		0	60.5764	0	65.0746	13	58	0	0
P06576	>sp|P06576|ATPB_HUMAN ATP synthase subunit beta, mitochondrial OS=Homo sapiens GN=ATP5B PE=1 SV=3	529	56.525	5.4	0	74.8266	0	51.2287	18	57	2	18		0	48.151	0	42.5331	14	37	2	14
P17174	>sp|P17174|AATC_HUMAN Aspartate aminotransferase, cytoplasmic OS=Homo sapiens GN=GOT1 PE=1 SV=3	413	46.219	7.01	0	56.0174	0	50.1211	18	56	2	18		0	38.3747	0	39.7094	14	36	2	14
P78371	>sp|P78371|TCPB_HUMAN T-complex protein 1 subunit beta OS=Homo sapiens GN=CCT2 PE=1 SV=4	535	57.452	6.46	0	61.1047	0	40.3738	16	51	0	16		0	32.4255	0	29.7196	12	31	0	12
P50990-2	>sp|P50990-2|TCPQ_HUMAN Isoform 2 of T-complex protein 1 subunit theta OS=Homo sapiens GN=CCT8	529	57.608	5.39	0	56.6402	0	41.2098	19	46	0	19		0	28.9645	0	21.3611	10	26	0	10
P67936	>sp|P67936|TPM4_HUMAN Tropomyosin alpha-4 chain OS=Homo sapiens GN=TPM4 PE=1 SV=3	248	28.504	4.69	0	41.5619	0	40.7258	14	37	2	5		0	20.0887	0	30.2419	8	17	1	4
P13928	>sp|P13928|ANXA8_HUMAN Annexin A8 OS=Homo sapiens GN=ANXA8 PE=1 SV=3	327	36.858	5.78	0	34.2458	0	41.2844	11	33	0	2		0	16.5163	0	19.8777	6	13	0	1
P14923	>sp|P14923|PLAK_HUMAN Junction plakoglobin OS=Homo sapiens GN=JUP PE=1 SV=3	745	81.693	6.14	0	67.71	0	30.7383	16	57	8	14		0	39.9241	0	23.3557	12	38	6	10
P04792	>sp|P04792|HSPB1_HUMAN Heat shock protein beta-1 OS=Homo sapiens GN=HSPB1 PE=1 SV=2	205	22.768	6.4	0	53.6294	0	71.7073	15	51	6	15		0	32.9804	0	68.2927	11	32	3	11
Q3ZCM7	>sp|Q3ZCM7|TBB8_HUMAN Tubulin beta-8 chain OS=Homo sapiens GN=TUBB8 PE=1 SV=2	444	49.744	4.89	0	35.6411	0	20.4955	8	45	0	1		0	22.6346	0	13.2883	6	26	0	0
P49588-2	>sp|P49588-2|SYAC_HUMAN Isoform 2 of Alanine--tRNA ligase, cytoplasmic OS=Homo sapiens GN=AARS	992	109.249	5.57	0	31.0617	0	14.5161	11	28	0	11	Acetyl [N-Term]	0	8.97055	0	4.43548	4	9	0	4
A6NNZ2	>sp|A6NNZ2|TBB8L_HUMAN Tubulin beta-8 chain-like protein LOC260334 OS=Homo sapiens PE=1 SV=1	444	49.541	4.86	0	30.9173	0	17.1171	7	42	0	0		0	20.0123	0	9.90991	5	24	0	0
P49257	>sp|P49257|LMAN1_HUMAN Protein ERGIC-53 OS=Homo sapiens GN=LMAN1 PE=1 SV=2	510	57.513	6.77	0	34.0613	0	22.3529	10	31	9	10		0	14.4063	0	14.5098	6	13	6	6
Q86UP2-2	>sp|Q86UP2-2|KTN1_HUMAN Isoform 2 of Kinectin OS=Homo sapiens GN=KTN1	1300	149.519	5.71	0	30.6593	0	10.2308	12	30	0	12		0	11.5318	0	4.92308	5	12	0	5
Q86UP2-4	>sp|Q86UP2-4|KTN1_HUMAN Isoform 4 of Kinectin OS=Homo sapiens GN=KTN1	1329	152.894	5.72	0	30.6593	0	10.0075	12	30	0	12		0	11.5318	0	4.81565	5	12	0	5
Q86UP2	>sp|Q86UP2|KTN1_HUMAN Kinectin OS=Homo sapiens GN=KTN1 PE=1 SV=1	1357	156.179	5.64	0	30.6593	0	9.80103	12	30	0	12		0	11.5318	0	4.71629	5	12	0	5
Q13748-2	>sp|Q13748-2|TBA3C_HUMAN Isoform 2 of Tubulin alpha-3C/D chain OS=Homo sapiens GN=TUBA3C	418	46.083	5.15	0	63.1822	0	41.6268	12	63	0	0		0	44.9513	0	43.5407	11	46	0	0
P17174-2	>sp|P17174-2|AATC_HUMAN Isoform 2 of Aspartate aminotransferase, cytoplasmic OS=Homo sapiens GN=GOT1	392	44.119	8.07	0	48.6676	0	50.2551	16	47	0	16		0	33.8555	0	39.2857	12	30	0	12
P11940-2	>sp|P11940-2|PABP1_HUMAN Isoform 2 of Polyadenylate-binding protein 1 OS=Homo sapiens GN=PABPC1	547	61.142	9.07	0	44.1852	0	24.6801	13	46	0	8		0	27.0429	0	21.2066	10	29	0	6
P11940	>sp|P11940|PABP1_HUMAN Polyadenylate-binding protein 1 OS=Homo sapiens GN=PABPC1 PE=1 SV=2	636	70.626	9.5	0	44.1852	0	21.2264	13	46	0	8		0	27.0429	0	18.239	10	29	0	6
Q5VT79	>sp|Q5VT79|AXA81_HUMAN Annexin A8-like protein 1 OS=Homo sapiens GN=ANXA8L1 PE=2 SV=2	327	36.856	5.78	0	33.6368	0	41.2844	11	32	0	2		0	16.7676	0	27.5229	7	15	0	2
P05023-2	>sp|P05023-2|AT1A1_HUMAN Isoform 2 of Sodium/potassium-transporting ATPase subunit alpha-1 OS=Homo sapiens GN=ATP1A1	681	74.093	6.02	0	35.2603	0	20.4112	12	31	0	9		0	16.0014	0	9.83847	6	14	0	6
P04350	>sp|P04350|TBB4A_HUMAN Tubulin beta-4A chain OS=Homo sapiens GN=TUBB4A PE=1 SV=2	444	49.554	4.88	0	70.5707	0	52.4775	17	80	0	2		0	58.3754	0	56.3063	17	64	1	2
Q13748	>sp|Q13748|TBA3C_HUMAN Tubulin alpha-3C/D chain OS=Homo sapiens GN=TUBA3C PE=1 SV=3	450	49.928	5.1	0	66.9919	0	43.1111	13	66	0	0		0	50.0917	0	44.8889	12	50	0	0
Q6PEY2	>sp|Q6PEY2|TBA3E_HUMAN Tubulin alpha-3E chain OS=Homo sapiens GN=TUBA3E PE=1 SV=2	450	49.827	5.14	0	52.7368	0	36.6667	10	56	0	0		0	37.0588	0	34	9	40	0	0
P67936-2	>sp|P67936-2|TPM4_HUMAN Isoform 2 of Tropomyosin alpha-4 chain OS=Homo sapiens GN=TPM4	284	32.703	4.73	0	33.309	0	30.2817	12	32	0	3		0	18.2016	0	21.4789	7	16	0	3
P31947	>sp|P31947|1433S_HUMAN 14-3-3 protein sigma OS=Homo sapiens GN=SFN PE=1 SV=1	248	27.757	4.74	0	36.6186	0	40.3226	11	31	1	9		0	17.3626	0	21.7742	6	15	0	4
P05120	>sp|P05120|PAI2_HUMAN Plasminogen activator inhibitor 2 OS=Homo sapiens GN=SERPINB2 PE=1 SV=2	415	46.566	5.63	0	32.6881	0	30.1205	12	31	3	12		0	15.9513	0	21.2048	6	15	2	6
P81605	>sp|P81605|DCD_HUMAN Dermcidin OS=Homo sapiens GN=DCD PE=1 SV=2	110	11.277	6.54	0	20.6338	0	42.7273	5	29	1	5		0	13.2221	0	22.7273	3	13	0	3
P00533-2	>sp|P00533-2|EGFR_HUMAN Isoform 2 of Epidermal growth factor receptor OS=Homo sapiens GN=EGFR	405	44.635	7.01	0	32.4091	0	22.2222	7	25	0	7		0	11.3942	0	10.8642	4	9	0	4
P32929-3	>sp|P32929-3|CGL_HUMAN Isoform 3 of Cystathionine gamma-lyase OS=Homo sapiens GN=CTH	373	41.234	6.86	0	27.6586	0	36.4611	9	27	0	9		0	11.1012	0	10.992	4	11	0	4
P32929	>sp|P32929|CGL_HUMAN Cystathionine gamma-lyase OS=Homo sapiens GN=CTH PE=1 SV=3	405	44.479	6.7	0	27.6586	0	33.5802	9	27	0	9		0	11.1012	0	10.1235	4	11	0	4
P13797-3	>sp|P13797-3|PLST_HUMAN Isoform 3 of Plastin-3 OS=Homo sapiens GN=PLS3	585	65.591	6.3	0	30.5675	0	20.5128	11	26	0	6		0	9.25084	0	7.52137	4	10	0	3
P13797-2	>sp|P13797-2|PLST_HUMAN Isoform 2 of Plastin-3 OS=Homo sapiens GN=PLS3	617	69.307	5.83	0	30.5675	0	19.4489	11	26	0	6		0	9.25084	0	7.13128	4	10	0	3
P13797	>sp|P13797|PLST_HUMAN Plastin-3 OS=Homo sapiens GN=PLS3 PE=1 SV=4	630	70.766	5.6	0	30.5675	0	19.0476	11	26	0	6		0	9.25084	0	6.98413	4	10	0	3
P06744	>sp|P06744|G6PI_HUMAN Glucose-6-phosphate isomerase OS=Homo sapiens GN=GPI PE=1 SV=4	558	63.107	8.32	0	42.3107	0	35.3047	14	43	0	14		0	26.3345	0	20.7885	10	28	0	10
P06744-2	>sp|P06744-2|G6PI_HUMAN Isoform 2 of Glucose-6-phosphate isomerase OS=Homo sapiens GN=GPI	569	64.284	8.91	0	42.3107	0	34.6221	14	43	0	14		0	26.3345	0	20.3866	10	28	0	10
P05387	>sp|P05387|RLA2_HUMAN 60S acidic ribosomal protein P2 OS=Homo sapiens GN=RPLP2 PE=1 SV=1	115	11.658	4.54	0	37.492	0	80	8	39	5	8		0	25.7991	0	76.5217	6	24	4	6
P11217	>sp|P11217|PYGM_HUMAN Glycogen phosphorylase, muscle form OS=Homo sapiens GN=PYGM PE=1 SV=6	842	97.031	7.03	0	33.4781	0	13.3017	11	44	0	0		0	25.6308	0	9.61995	9	29	0	1
P13796	>sp|P13796|PLSL_HUMAN Plastin-2 OS=Homo sapiens GN=LCP1 PE=1 SV=6	627	70.244	5.43	0	50.1306	0	31.8979	16	39	6	12		0	20.7159	0	13.8756	7	24	2	6
Q13740-2	>sp|Q13740-2|CD166_HUMAN Isoform 2 of CD166 antigen OS=Homo sapiens GN=ALCAM	570	63.624	7.3	0	36.8767	0	34.5614	13	32	0	13		0	18.7469	0	15.0877	6	17	0	6
Q13740	>sp|Q13740|CD166_HUMAN CD166 antigen OS=Homo sapiens GN=ALCAM PE=1 SV=2	583	65.061	6.25	0	36.8767	0	33.7907	13	32	0	13		0	18.7469	0	14.7513	6	17	0	6
Q86UP2-3	>sp|Q86UP2-3|KTN1_HUMAN Isoform 3 of Kinectin OS=Homo sapiens GN=KTN1	1306	150.26	5.74	0	27.9237	0	9.18836	11	27	0	11		0	11.5318	0	4.90046	5	12	0	5
P00492	>sp|P00492|HPRT_HUMAN Hypoxanthine-guanine phosphoribosyltransferase OS=Homo sapiens GN=HPRT1 PE=1 SV=2	218	24.564	6.68	0	21.9572	0	44.0367	7	22	6	7		0	9.50689	0	21.5596	4	7	4	4
Q02413	>sp|Q02413|DSG1_HUMAN Desmoglein-1 OS=Homo sapiens GN=DSG1 PE=1 SV=2	1049	113.676	5.03	0	63.1955	0	18.1125	15	50	12	15		0	40.3215	0	14.2993	11	36	11	11
Q13509-2	>sp|Q13509-2|TBB3_HUMAN Isoform 2 of Tubulin beta-3 chain OS=Homo sapiens GN=TUBB3	378	42.405	4.96	0	45.372	0	20.1058	9	50	0	0		0	35.0402	0	24.0741	9	36	0	0
P25705	>sp|P25705|ATPA_HUMAN ATP synthase subunit alpha, mitochondrial OS=Homo sapiens GN=ATP5A1 PE=1 SV=1	553	59.714	9.13	0	49.9631	0	30.5606	14	40	0	14		0	32.0275	0	26.2206	12	26	0	12
P05556-2	>sp|P05556-2|ITB1_HUMAN Isoform 2 of Integrin beta-1 OS=Homo sapiens GN=ITGB1	789	87.389	5.48	0	33.3521	0	15.9696	11	31	0	11		0	18.3274	0	9.63245	6	17	0	6
P05556-5	>sp|P05556-5|ITB1_HUMAN Isoform 5 of Integrin beta-1 OS=Homo sapiens GN=ITGB1	801	88.825	5.48	0	33.3521	0	15.7303	11	31	0	11		0	18.3274	0	9.48814	6	17	0	6
P05556-4	>sp|P05556-4|ITB1_HUMAN Isoform 4 of Integrin beta-1 OS=Homo sapiens GN=ITGB1	819	90.974	5.44	0	33.3521	0	15.3846	11	31	0	11		0	18.3274	0	9.27961	6	17	0	6
P05556-3	>sp|P05556-3|ITB1_HUMAN Isoform 3 of Integrin beta-1 OS=Homo sapiens GN=ITGB1	825	91.56	5.44	0	33.3521	0	15.2727	11	31	0	11		0	18.3274	0	9.21212	6	17	0	6
P07951-2	>sp|P07951-2|TPM2_HUMAN Isoform 2 of Tropomyosin beta chain OS=Homo sapiens GN=TPM2	284	32.97	4.67	0	28.3885	0	25.7042	10	26	0	1		0	13.9132	0	13.3803	5	12	0	2
Q9Y265-2	>sp|Q9Y265-2|RUVB1_HUMAN Isoform 2 of RuvB-like 1 OS=Homo sapiens GN=RUVBL1	386	42.1	6.38	0	35.2696	0	34.456	10	26	0	10		0	10.4498	0	14.2487	4	12	0	4
P14625	>sp|P14625|ENPL_HUMAN Endoplasmin OS=Homo sapiens GN=HSP90B1 PE=1 SV=1	803	92.411	4.84	0	62.5241	0	24.6575	19	55	5	17		0	51.6311	0	24.6575	17	42	5	15
P35222	>sp|P35222|CTNB1_HUMAN Catenin beta-1 OS=Homo sapiens GN=CTNNB1 PE=1 SV=1	781	85.442	5.86	0	43.3512	0	23.0474	13	38	0	11		0	33.2721	0	21.895	11	25	0	9
P25705-2	>sp|P25705-2|ATPA_HUMAN Isoform 2 of ATP synthase subunit alpha, mitochondrial OS=Homo sapiens GN=ATP5A1	503	54.46	8.24	0	45.4432	0	31.0139	13	38	0	13		0	29.8279	0	26.2425	11	25	0	11
P31947-2	>sp|P31947-2|1433S_HUMAN Isoform 2 of 14-3-3 protein sigma OS=Homo sapiens GN=SFN	216	24.321	4.82	0	35.0578	0	36.1111	10	28	0	8		0	17.3626	0	25	6	15	0	4
Q14315-2	>sp|Q14315-2|FLNC_HUMAN Isoform 2 of Filamin-C OS=Homo sapiens GN=FLNC	2692	287.102	5.97	0	29.3613	0	3.26895	11	29	0	4		0	15.0527	0	2.30312	6	16	0	2
Q14315	>sp|Q14315|FLNC_HUMAN Filamin-C OS=Homo sapiens GN=FLNC PE=1 SV=3	2725	290.841	5.97	0	29.3613	0	3.22936	11	29	0	4		0	15.0527	0	2.27523	6	16	0	2
P07951	>sp|P07951|TPM2_HUMAN Tropomyosin beta chain OS=Homo sapiens GN=TPM2 PE=1 SV=1	284	32.831	4.7	0	26.8628	0	21.1268	9	25	0	0		0	13.9132	0	13.3803	5	12	0	2
Q6KB66-3	>sp|Q6KB66-3|K2C80_HUMAN Isoform 3 of Keratin, type II cytoskeletal 80 OS=Homo sapiens GN=KRT80	487	54.142	5.39	0	13.654	0	8.41889	4	31	0	3		0	13.124	0	9.85626	5	18	0	4
P26641	>sp|P26641|EF1G_HUMAN Elongation factor 1-gamma OS=Homo sapiens GN=EEF1G PE=1 SV=3	437	50.087	6.67	0	30.2509	0	24.2563	8	25	0	8		0	12.8906	0	10.5263	4	12	0	4
P26641-2	>sp|P26641-2|EF1G_HUMAN Isoform 2 of Elongation factor 1-gamma OS=Homo sapiens GN=EEF1G	487	56.114	7.72	0	30.2509	0	21.7659	8	25	0	8		0	12.8906	0	9.44559	4	12	0	4
P31153-2	>sp|P31153-2|METK2_HUMAN Isoform 2 of S-adenosylmethionine synthase isoform type-2 OS=Homo sapiens GN=MAT2A	299	32.944	7.25	0	25.4746	0	29.7659	8	21	0	8		0	10.4966	0	16.388	4	8	0	4
P09493	>sp|P09493|TPM1_HUMAN Tropomyosin alpha-1 chain OS=Homo sapiens GN=TPM1 PE=1 SV=2	284	32.689	4.74	0	19.8364	0	21.1268	8	19	0	1		0	9.65084	0	9.50704	3	6	0	0
P09493-10	>sp|P09493-10|TPM1_HUMAN Isoform 10 of Tropomyosin alpha-1 chain OS=Homo sapiens GN=TPM1	284	32.846	4.77	0	19.8364	0	21.1268	8	19	0	1		0	9.65084	0	9.50704	3	6	0	0
P09493-3	>sp|P09493-3|TPM1_HUMAN Isoform 3 of Tropomyosin alpha-1 chain OS=Homo sapiens GN=TPM1	284	32.856	4.78	0	19.8364	0	21.1268	8	19	0	1		0	9.65084	0	9.50704	3	6	0	0
P09493-4	>sp|P09493-4|TPM1_HUMAN Isoform 4 of Tropomyosin alpha-1 chain OS=Homo sapiens GN=TPM1	284	32.828	4.77	0	19.8364	0	21.1268	8	19	0	1		0	9.65084	0	9.50704	3	6	0	0
P09493-9	>sp|P09493-9|TPM1_HUMAN Isoform 9 of Tropomyosin alpha-1 chain OS=Homo sapiens GN=TPM1	284	32.717	4.75	0	19.8364	0	21.1268	8	19	0	1		0	9.65084	0	9.50704	3	6	0	0
P18669	>sp|P18669|PGAM1_HUMAN Phosphoglycerate mutase 1 OS=Homo sapiens GN=PGAM1 PE=1 SV=2	254	28.786	7.18	0	63.6876	0	65.748	12	58	6	12		0	43.6303	0	60.2362	12	46	6	12
P12429	>sp|P12429|ANXA3_HUMAN Annexin A3 OS=Homo sapiens GN=ANXA3 PE=1 SV=3	323	36.353	5.92	0	56.1757	0	46.4396	16	48	0	16		0	38.4895	0	38.6997	11	36	0	11
P14618-2	>sp|P14618-2|KPYM_HUMAN Isoform M1 of Pyruvate kinase PKM OS=Homo sapiens GN=PKM	531	58.025	7.71	0	53.0308	0	41.6196	16	42	0	16		0	36.4781	0	31.6384	12	30	0	12
Q08554-2	>sp|Q08554-2|DSC1_HUMAN Isoform 1B of Desmocollin-1 OS=Homo sapiens GN=DSC1	840	93.776	5.53	0	45.7535	0	15.8333	11	35	0	11		0	30.0012	0	11.5476	8	23	0	8
Q08554	>sp|Q08554|DSC1_HUMAN Desmocollin-1 OS=Homo sapiens GN=DSC1 PE=1 SV=2	894	99.924	5.43	0	45.7535	0	14.877	11	35	0	11		0	30.0012	0	10.8501	8	23	0	8
P50990-3	>sp|P50990-3|TCPQ_HUMAN Isoform 3 of T-complex protein 1 subunit theta OS=Homo sapiens GN=CCT8	475	51.553	5.24	0	44.9342	0	37.4737	15	35	0	15		0	25.6366	0	21.2632	9	23	0	9
P11217-2	>sp|P11217-2|PYGM_HUMAN Isoform 2 of Glycogen phosphorylase, muscle form OS=Homo sapiens GN=PYGM	754	87.262	8.41	0	30.7036	0	11.9363	10	41	0	0		0	25.6308	0	10.7427	9	29	0	1
Q9BUF5	>sp|Q9BUF5|TBB6_HUMAN Tubulin beta-6 chain OS=Homo sapiens GN=TUBB6 PE=1 SV=1	446	49.825	4.88	0	29.2654	0	10.9865	6	39	0	0		0	24.0091	0	15.0224	6	27	0	1
P05556	>sp|P05556|ITB1_HUMAN Integrin beta-1 OS=Homo sapiens GN=ITGB1 PE=1 SV=2	798	88.357	5.39	0	38.1285	0	18.2957	13	35	2	13		0	23.2124	0	12.0301	8	23	2	8
P09525	>sp|P09525|ANXA4_HUMAN Annexin A4 OS=Homo sapiens GN=ANXA4 PE=1 SV=4	319	35.86	6.13	0	34.871	0	36.3636	9	28	0	9		0	18.3045	0	26.0188	6	16	0	6
P17987	>sp|P17987|TCPA_HUMAN T-complex protein 1 subunit alpha OS=Homo sapiens GN=TCP1 PE=1 SV=1	556	60.306	6.11	0	25.6127	0	20.6835	8	26	0	8		0	16.5943	0	11.8705	5	14	0	5
Q9Y265	>sp|Q9Y265|RUVB1_HUMAN RuvB-like 1 OS=Homo sapiens GN=RUVBL1 PE=1 SV=1	456	50.196	6.42	0	41.2278	0	37.0614	12	30	0	12		0	15.7673	0	19.9561	6	18	0	6
P07951-3	>sp|P07951-3|TPM2_HUMAN Isoform 3 of Tropomyosin beta chain OS=Homo sapiens GN=TPM2	248	28.666	4.63	0	26.166	0	23.7903	9	24	0	1		0	13.9132	0	15.3226	5	12	0	2
Q13561	>sp|Q13561|DCTN2_HUMAN Dynactin subunit 2 OS=Homo sapiens GN=DCTN2 PE=1 SV=4	401	44.204	5.21	0	21.2776	0	24.6883	8	22	0	8		0	11.7836	0	13.7157	5	10	0	5
Q13561-3	>sp|Q13561-3|DCTN2_HUMAN Isoform 3 of Dynactin subunit 2 OS=Homo sapiens GN=DCTN2	403	44.446	5.17	0	21.2776	0	24.5658	8	22	0	8		0	11.7836	0	13.6476	5	10	0	5
Q13561-2	>sp|Q13561-2|DCTN2_HUMAN Isoform 2 of Dynactin subunit 2 OS=Homo sapiens GN=DCTN2	406	44.792	5.17	0	21.2776	0	24.3842	8	22	0	8		0	11.7836	0	13.5468	5	10	0	5
P13928-3	>sp|P13928-3|ANXA8_HUMAN Isoform 3 of Annexin A8 OS=Homo sapiens GN=ANXA8	265	29.998	5.34	0	22.219	0	40.7547	8	20	0	1		0	10.0626	0	14.717	4	8	0	0
P50993	>sp|P50993|AT1A2_HUMAN Sodium/potassium-transporting ATPase subunit alpha-2 OS=Homo sapiens GN=ATP1A2 PE=1 SV=1	1020	112.193	5.66	0	20.2295	0	10.098	7	20	0	1		0	9.16192	0	4.11765	3	8	0	3
P17066	>sp|P17066|HSP76_HUMAN Heat shock 70 kDa protein 6 OS=Homo sapiens GN=HSPA6 PE=1 SV=2	643	70.984	6.14	0	58.1644	0	15.2411	10	64	0	0		0	52.1241	0	13.9969	10	53	0	0
P07737	>sp|P07737|PROF1_HUMAN Profilin-1 OS=Homo sapiens GN=PFN1 PE=1 SV=2	140	15.045	8.27	0	48.4277	0	68.5714	10	55	0	10		0	39.8516	0	65	9	44	0	9
Q8N1N4	>sp|Q8N1N4|K2C78_HUMAN Keratin, type II cytoskeletal 78 OS=Homo sapiens GN=KRT78 PE=2 SV=2	520	56.83	6.02	0	46.9282	0	28.4615	15	40	3	13		0	28.6377	0	20.5769	11	29	1	10
O14818	>sp|O14818|PSA7_HUMAN Proteasome subunit alpha type-7 OS=Homo sapiens GN=PSMA7 PE=1 SV=1	248	27.87	8.46	0	37.5463	0	56.0484	11	34	0	11		0	24.1199	0	44.3548	8	23	0	8
Q16658	>sp|Q16658|FSCN1_HUMAN Fascin OS=Homo sapiens GN=FSCN1 PE=1 SV=3	493	54.496	7.24	0	39.387	0	28.3976	11	32	9	11		0	19.6851	0	21.9067	8	21	7	8
Q13310-2	>sp|Q13310-2|PABP4_HUMAN Isoform 2 of Polyadenylate-binding protein 4 OS=Homo sapiens GN=PABPC4	631	69.535	9.52	0	31.9721	0	16.9572	9	29	0	4		0	18.637	0	16.6403	7	18	0	3
Q13310	>sp|Q13310|PABP4_HUMAN Polyadenylate-binding protein 4 OS=Homo sapiens GN=PABPC4 PE=1 SV=1	644	70.738	9.26	0	31.9721	0	16.6149	9	29	0	4		0	18.637	0	16.3043	7	18	0	3
Q13310-3	>sp|Q13310-3|PABP4_HUMAN Isoform 3 of Polyadenylate-binding protein 4 OS=Homo sapiens GN=PABPC4	660	72.345	9.35	0	31.9721	0	16.2121	9	29	0	4		0	18.637	0	15.9091	7	18	0	3
Q6KB66-2	>sp|Q6KB66-2|K2C80_HUMAN Isoform 2 of Keratin, type II cytoskeletal 80 OS=Homo sapiens GN=KRT80	422	47.212	5.3	0	16.9834	0	13.5071	6	36	0	5		0	18.1458	0	17.2986	8	25	0	7
Q6KB66	>sp|Q6KB66|K2C80_HUMAN Keratin, type II cytoskeletal 80 OS=Homo sapiens GN=KRT80 PE=1 SV=2	452	50.494	5.67	0	16.9834	0	12.6106	6	36	0	5		0	18.1458	0	16.1504	8	25	0	7
O14818-2	>sp|O14818-2|PSA7_HUMAN Isoform 2 of Proteasome subunit alpha type-7 OS=Homo sapiens GN=PSMA7	178	20.181	8.51	0	30.2288	0	58.427	8	26	0	8		0	17.1384	0	42.6966	5	15	0	5
P04439	>sp|P04439|1A03_HUMAN HLA class I histocompatibility antigen, A-3 alpha chain OS=Homo sapiens GN=HLA-A PE=1 SV=2	365	40.815	6	0	27.4452	0	30.9589	8	23	0	7		0	15.6022	0	21.0959	6	12	0	6
Q58FF8	>sp|Q58FF8|H90B2_HUMAN Putative heat shock protein HSP 90-beta 2 OS=Homo sapiens GN=HSP90AB2P PE=1 SV=2	381	44.321	4.84	0	25.9401	0	20.21	8	27	0	4		0	15.4398	0	13.9108	5	16	0	3
Q9BS26	>sp|Q9BS26|ERP44_HUMAN Endoplasmic reticulum resident protein 44 OS=Homo sapiens GN=ERP44 PE=1 SV=1	406	46.941	5.26	0	28.2704	0	23.8916	8	24	7	8		0	15.1449	0	16.7488	5	13	5	5
P28074	>sp|P28074|PSB5_HUMAN Proteasome subunit beta type-5 OS=Homo sapiens GN=PSMB5 PE=1 SV=3	263	28.462	6.92	0	22.9427	0	27.7567	6	18	0	6		0	12.065	0	19.7719	4	7	0	4
P32119	>sp|P32119|PRDX2_HUMAN Peroxiredoxin-2 OS=Homo sapiens GN=PRDX2 PE=1 SV=5	198	21.878	5.97	0	23.7348	0	47.9798	8	26	3	7		0	10.8248	0	18.6869	3	15	1	2
P09493-2	>sp|P09493-2|TPM1_HUMAN Isoform 2 of Tropomyosin alpha-1 chain OS=Homo sapiens GN=TPM1	228	26.664	4.82	0	17.614	0	20.1754	7	17	0	1		0	9.65084	0	11.8421	3	6	0	0
P09493-5	>sp|P09493-5|TPM1_HUMAN Isoform 5 of Tropomyosin alpha-1 chain OS=Homo sapiens GN=TPM1	245	28.368	4.77	0	17.614	0	18.7755	7	17	0	1		0	9.65084	0	11.0204	3	6	0	0
P09493-6	>sp|P09493-6|TPM1_HUMAN Isoform 6 of Tropomyosin alpha-1 chain OS=Homo sapiens GN=TPM1	284	32.63	4.73	0	17.614	0	16.1972	7	17	0	1		0	9.65084	0	9.50704	3	6	0	0
P09493-7	>sp|P09493-7|TPM1_HUMAN Isoform 7 of Tropomyosin alpha-1 chain OS=Homo sapiens GN=TPM1	284	32.658	4.74	0	17.614	0	16.1972	7	17	0	1		0	9.65084	0	9.50704	3	6	0	0
P09493-8	>sp|P09493-8|TPM1_HUMAN Isoform 8 of Tropomyosin alpha-1 chain OS=Homo sapiens GN=TPM1	284	32.797	4.75	0	17.614	0	16.1972	7	17	0	1		0	9.65084	0	9.50704	3	6	0	0
P14618	>sp|P14618|KPYM_HUMAN Pyruvate kinase PKM OS=Homo sapiens GN=PKM PE=1 SV=4	531	57.9	7.84	0	65.6786	0	48.9642	19	55	0	19		0	53.0237	0	38.9831	15	45	0	15
P40926	>sp|P40926|MDHM_HUMAN Malate dehydrogenase, mitochondrial OS=Homo sapiens GN=MDH2 PE=1 SV=3	338	35.481	8.68	0	52.3692	0	48.5207	13	50	0	13		0	39.6962	0	45.858	11	40	0	11
P40926-2	>sp|P40926-2|MDHM_HUMAN Isoform 2 of Malate dehydrogenase, mitochondrial OS=Homo sapiens GN=MDH2	296	30.855	8.43	0	45.8822	0	48.6486	11	44	0	11		0	33.6594	0	45.6081	9	34	0	9
Q15149-7	>sp|Q15149-7|PLEC_HUMAN Isoform 7 of Plectin OS=Homo sapiens GN=PLEC	4515	512.292	5.77	0	38.4587	0	2.30343	9	34	0	1		0	26.6807	0	2.30343	8	24	0	1
Q15149-8	>sp|Q15149-8|PLEC_HUMAN Isoform 8 of Plectin OS=Homo sapiens GN=PLEC	4525	513.393	5.76	0	38.4587	0	2.29834	9	34	0	1		0	26.6807	0	2.29834	8	24	0	1
Q15149-9	>sp|Q15149-9|PLEC_HUMAN Isoform 9 of Plectin OS=Homo sapiens GN=PLEC	4533	514.461	5.73	0	38.4587	0	2.29429	9	34	0	1		0	26.6807	0	2.29429	8	24	0	1
Q15149-4	>sp|Q15149-4|PLEC_HUMAN Isoform 4 of Plectin OS=Homo sapiens GN=PLEC	4547	515.884	5.8	0	38.4587	0	2.28722	9	34	0	1		0	26.6807	0	2.28722	8	24	0	1
Q15149-5	>sp|Q15149-5|PLEC_HUMAN Isoform 5 of Plectin OS=Homo sapiens GN=PLEC	4547	515.962	5.78	0	38.4587	0	2.28722	9	34	0	1		0	26.6807	0	2.28722	8	24	0	1
Q15149-6	>sp|Q15149-6|PLEC_HUMAN Isoform 6 of Plectin OS=Homo sapiens GN=PLEC	4551	516.164	5.76	0	38.4587	0	2.28521	9	34	0	1		0	26.6807	0	2.28521	8	24	0	1
Q15149-3	>sp|Q15149-3|PLEC_HUMAN Isoform 3 of Plectin OS=Homo sapiens GN=PLEC	4570	517.716	5.74	0	38.4587	0	2.27571	9	34	0	1		0	26.6807	0	2.27571	8	24	0	1
Q15149-2	>sp|Q15149-2|PLEC_HUMAN Isoform 2 of Plectin OS=Homo sapiens GN=PLEC	4574	518.157	5.74	0	38.4587	0	2.27372	9	34	0	1		0	26.6807	0	2.27372	8	24	0	1
Q15149	>sp|Q15149|PLEC_HUMAN Plectin OS=Homo sapiens GN=PLEC PE=1 SV=3	4684	531.466	5.96	0	38.4587	0	2.22032	9	34	0	1		0	26.6807	0	2.22032	8	24	0	1
P04083	>sp|P04083|ANXA1_HUMAN Annexin A1 OS=Homo sapiens GN=ANXA1 PE=1 SV=2	346	38.69	7.02	0	39.9543	0	29.4798	10	33	4	10		0	24.9043	0	26.0116	8	23	3	8
Q96C19	>sp|Q96C19|EFHD2_HUMAN EF-hand domain-containing protein D2 OS=Homo sapiens GN=EFHD2 PE=1 SV=1	240	26.68	5.2	0	29.0665	0	42.5	9	25	4	9		0	15.7882	0	27.5	6	15	3	6
Q13126-4	>sp|Q13126-4|MTAP_HUMAN Isoform 4 of S-methyl-5'-thioadenosine phosphorylase OS=Homo sapiens GN=MTAP	280	30.818	7.15	0	24.8477	0	40.7143	9	25	0	9		0	14.435	0	29.6429	5	15	0	5
Q13126	>sp|Q13126|MTAP_HUMAN S-methyl-5'-thioadenosine phosphorylase OS=Homo sapiens GN=MTAP PE=1 SV=2	283	31.216	7.18	0	24.8477	0	40.2827	9	25	0	9		0	14.435	0	29.3286	5	15	0	5
Q13126-3	>sp|Q13126-3|MTAP_HUMAN Isoform 3 of S-methyl-5'-thioadenosine phosphorylase OS=Homo sapiens GN=MTAP	334	36.912	6.52	0	24.8477	0	34.1317	9	25	0	9		0	14.435	0	24.8503	5	15	0	5
Q13126-2	>sp|Q13126-2|MTAP_HUMAN Isoform 2 of S-methyl-5'-thioadenosine phosphorylase OS=Homo sapiens GN=MTAP	346	38.331	8.12	0	24.8477	0	32.948	9	25	0	9		0	14.435	0	23.9884	5	15	0	5
O14908	>sp|O14908|GIPC1_HUMAN PDZ domain-containing protein GIPC1 OS=Homo sapiens GN=GIPC1 PE=1 SV=2	333	36.027	6.28	0	26.3137	0	28.8288	8	21	1	8		0	12.9536	0	17.7177	4	11	0	4
P13637	>sp|P13637|AT1A3_HUMAN Sodium/potassium-transporting ATPase subunit alpha-3 OS=Homo sapiens GN=ATP1A3 PE=1 SV=3	1013	111.677	5.38	0	22.7749	0	9.4768	7	21	0	2		0	12.1069	0	5.23198	4	11	0	4
P13637-2	>sp|P13637-2|AT1A3_HUMAN Isoform 2 of Sodium/potassium-transporting ATPase subunit alpha-3 OS=Homo sapiens GN=ATP1A3	1024	113.062	5.39	0	22.7749	0	9.375	7	21	0	2		0	12.1069	0	5.17578	4	11	0	4
P13637-3	>sp|P13637-3|AT1A3_HUMAN Isoform 3 of Sodium/potassium-transporting ATPase subunit alpha-3 OS=Homo sapiens GN=ATP1A3	1026	112.987	5.38	0	22.7749	0	9.35673	7	21	0	2		0	12.1069	0	5.16569	4	11	0	4
P50502	>sp|P50502|F10A1_HUMAN Hsc70-interacting protein OS=Homo sapiens GN=ST13 PE=1 SV=2	369	41.305	5.27	0	21.2868	0	20.8672	7	22	0	7		0	11.665	0	11.9241	4	12	0	4
Q13126-7	>sp|Q13126-7|MTAP_HUMAN Isoform 7 of S-methyl-5'-thioadenosine phosphorylase OS=Homo sapiens GN=MTAP	239	26.261	6.62	0	21.2871	0	38.0753	8	22	0	8		0	11.2232	0	25.1046	4	12	0	4
Q13126-6	>sp|Q13126-6|MTAP_HUMAN Isoform 6 of S-methyl-5'-thioadenosine phosphorylase OS=Homo sapiens GN=MTAP	293	32.355	6.11	0	21.2871	0	31.058	8	22	0	8		0	11.2232	0	20.4778	4	12	0	4
Q13126-5	>sp|Q13126-5|MTAP_HUMAN Isoform 5 of S-methyl-5'-thioadenosine phosphorylase OS=Homo sapiens GN=MTAP	305	33.775	7.81	0	21.2871	0	29.8361	8	22	0	8		0	11.2232	0	19.6721	4	12	0	4
Q9P2B2	>sp|Q9P2B2|FPRP_HUMAN Prostaglandin F2 receptor negative regulator OS=Homo sapiens GN=PTGFRN PE=1 SV=2	879	98.495	6.61	0	23.519	0	11.3766	8	21	8	8		0	10.2695	0	4.32309	4	11	4	4
P06753-7	>sp|P06753-7|TPM3_HUMAN Isoform 7 of Tropomyosin alpha-3 chain OS=Homo sapiens GN=TPM3	158	18.591	4.74	0	16.129	0	30.3797	5	18	0	4		0	9.88364	0	30.3797	4	8	0	3
P28074-3	>sp|P28074-3|PSB5_HUMAN Isoform 3 of Proteasome subunit beta type-5 OS=Homo sapiens GN=PSMB5	160	17.771	7.24	0	17.3591	0	31.25	4	15	0	4		0	9.24826	0	26.25	3	5	0	3
P37837	>sp|P37837|TALDO_HUMAN Transaldolase OS=Homo sapiens GN=TALDO1 PE=1 SV=2	337	37.516	6.81	0	25.9006	0	25.5193	9	27	4	9		0	18.4789	0	23.1454	7	18	1	7
P60174-1	>sp|P60174-1|TPIS_HUMAN Isoform 2 of Triosephosphate isomerase OS=Homo sapiens GN=TPI1	249	26.653	6.9	0	29.1168	0	55.4217	9	24	0	9		0	15.8247	0	38.1526	6	15	0	6
P60174	>sp|P60174|TPIS_HUMAN Triosephosphate isomerase OS=Homo sapiens GN=TPI1 PE=1 SV=3	286	30.772	5.92	0	29.1168	0	48.2517	9	24	0	9		0	15.8247	0	33.2168	6	15	0	6
P23528	>sp|P23528|COF1_HUMAN Cofilin-1 OS=Homo sapiens GN=CFL1 PE=1 SV=3	166	18.491	8.09	0	25.8092	0	55.4217	8	27	0	8		0	14.5507	0	54.2169	6	18	0	6
P25705-3	>sp|P25705-3|ATPA_HUMAN Isoform 3 of ATP synthase subunit alpha, mitochondrial OS=Homo sapiens GN=ATP5A1	531	57.511	9.29	0	39.9	0	25.4237	11	31	0	11		0	25.4718	0	22.0339	10	23	0	10
P48643	>sp|P48643|TCPE_HUMAN T-complex protein 1 subunit epsilon OS=Homo sapiens GN=CCT5 PE=1 SV=1	541	59.633	5.66	0	28.4295	0	22.366	10	28	0	10		0	18.3181	0	15.342	6	20	0	6
P25398	>sp|P25398|RS12_HUMAN 40S ribosomal protein S12 OS=Homo sapiens GN=RPS12 PE=1 SV=3	132	14.505	7.21	0	18.8963	0	43.9394	6	23	6	6		0	15.0369	0	40.1515	5	15	5	5
Q9H361	>sp|Q9H361|PABP3_HUMAN Polyadenylate-binding protein 3 OS=Homo sapiens GN=PABPC3 PE=1 SV=2	631	69.987	9.67	0	23.253	0	10.935	7	24	0	5		0	13.3937	0	9.35024	5	16	0	4
P13746	>sp|P13746|1A11_HUMAN HLA class I histocompatibility antigen, A-11 alpha chain OS=Homo sapiens GN=HLA-A PE=1 SV=1	365	40.911	6.15	0	21.1576	0	24.6575	6	17	0	6		0	13.072	0	18.0822	5	9	0	5
P13746-2	>sp|P13746-2|1A11_HUMAN Isoform 2 of HLA class I histocompatibility antigen, A-11 alpha chain OS=Homo sapiens GN=HLA-A	371	41.438	6.15	0	21.1576	0	24.2588	6	17	0	6		0	13.072	0	17.7898	5	9	0	5
P13928-2	>sp|P13928-2|ANXA8_HUMAN Isoform 2 of Annexin A8 OS=Homo sapiens GN=ANXA8	141	16.06	8.78	0	17.5887	0	33.3333	5	18	0	1		0	11.7413	0	32.6241	4	10	0	1
P09496-2	>sp|P09496-2|CLCA_HUMAN Isoform Non-brain of Clathrin light chain A OS=Homo sapiens GN=CLTA	218	23.647	4.53	0	18.3959	0	22.9358	5	17	0	5		0	10.3537	0	22.0183	4	9	0	4
P10314	>sp|P10314|1A32_HUMAN HLA class I histocompatibility antigen, A-32 alpha chain OS=Homo sapiens GN=HLA-A PE=1 SV=2	365	41.022	6.47	0	16.8483	0	20.5479	5	15	0	4		0	9.98848	0	13.9726	4	7	0	4
P30459	>sp|P30459|1A74_HUMAN HLA class I histocompatibility antigen, A-74 alpha chain OS=Homo sapiens GN=HLA-A PE=1 SV=1	365	40.865	6.47	0	16.8483	0	20.5479	5	15	0	4		0	9.98848	0	13.9726	4	7	0	4
P12273	>sp|P12273|PIP_HUMAN Prolactin-inducible protein OS=Homo sapiens GN=PIP PE=1 SV=1	146	16.562	8.05	0	18.1673	0	55.4795	6	16	6	6		0	9.56823	0	26.7123	3	8	3	3
P54652	>sp|P54652|HSP72_HUMAN Heat shock-related 70 kDa protein 2 OS=Homo sapiens GN=HSPA2 PE=1 SV=1	639	69.978	5.74	0	68.1178	0	15.8059	11	67	0	7		0	64.048	0	15.8059	12	60	0	7
P14618-3	>sp|P14618-3|KPYM_HUMAN Isoform 3 of Pyruvate kinase PKM OS=Homo sapiens GN=PKM	516	56.237	8.44	0	56.3831	0	42.6357	16	48	0	16		0	47.4524	0	34.8837	13	41	0	13
Q9NY65-2	>sp|Q9NY65-2|TBA8_HUMAN Isoform 2 of Tubulin alpha-8 chain OS=Homo sapiens GN=TUBA8	383	42.926	5.08	0	47.4374	0	36.0313	10	44	0	0		0	40.0145	0	36.0313	8	37	0	0
Q9NY65	>sp|Q9NY65|TBA8_HUMAN Tubulin alpha-8 chain OS=Homo sapiens GN=TUBA8 PE=1 SV=1	449	50.062	5.06	0	47.4374	0	30.735	10	44	0	0		0	40.0145	0	30.735	8	37	0	0
P48741	>sp|P48741|HSP77_HUMAN Putative heat shock 70 kDa protein 7 OS=Homo sapiens GN=HSPA7 PE=5 SV=2	367	40.22	7.87	0	31.2338	0	16.3488	6	35	0	4		0	26.3708	0	14.1689	5	28	0	3
P68104-2	>sp|P68104-2|EF1A1_HUMAN Isoform 2 of Elongation factor 1-alpha 1 OS=Homo sapiens GN=EEF1A1	441	47.839	9.03	0	31.2804	0	26.3039	8	31	0	8		0	24.7907	0	24.4898	7	24	0	7
P23526	>sp|P23526|SAHH_HUMAN Adenosylhomocysteinase OS=Homo sapiens GN=AHCY PE=1 SV=4	432	47.685	6.34	0	23.0457	0	17.8241	7	25	1	7		0	17.9004	0	12.963	5	18	1	5
Q99102-10	>sp|Q99102-10|MUC4_HUMAN Isoform 10 of Mucin-4 OS=Homo sapiens GN=MUC4	2117	225.293	6.19	0	24.4495	0	5.90458	8	18	0	8		0	16.4257	0	4.34577	6	11	0	6
Q99102	>sp|Q99102|MUC4_HUMAN Mucin-4 OS=Homo sapiens GN=MUC4 PE=1 SV=4	2169	231.373	6.27	0	24.4495	0	5.76302	8	18	0	8		0	16.4257	0	4.24159	6	11	0	6
Q99829	>sp|Q99829|CPNE1_HUMAN Copine-1 OS=Homo sapiens GN=CPNE1 PE=1 SV=1	537	59.022	5.83	0	23.659	0	12.8492	8	24	0	8		0	15.1306	0	12.1043	5	17	0	5
P48643-2	>sp|P48643-2|TCPE_HUMAN Isoform 2 of T-complex protein 1 subunit epsilon OS=Homo sapiens GN=CCT5	448	49.495	6.19	0	23.105	0	21.4286	7	23	0	7		0	14.6377	0	14.5089	4	16	0	4
P23526-2	>sp|P23526-2|SAHH_HUMAN Isoform 2 of Adenosylhomocysteinase OS=Homo sapiens GN=AHCY	404	44.63	6.47	0	19.8858	0	16.3366	6	22	0	6		0	14.5773	0	11.1386	4	15	0	4
P60174-4	>sp|P60174-4|TPIS_HUMAN Isoform 4 of Triosephosphate isomerase OS=Homo sapiens GN=TPI1	167	17.947	5.58	0	23.9612	0	64.0719	7	20	0	7		0	13.9792	0	52.0958	5	13	0	5
Q01650	>sp|Q01650|LAT1_HUMAN Large neutral amino acids transporter small subunit 1 OS=Homo sapiens GN=SLC7A5 PE=1 SV=2	507	54.974	7.72	0	22.4041	0	8.08679	4	18	3	4		0	13.2374	0	7.69231	3	11	2	3
P30443	>sp|P30443|1A01_HUMAN HLA class I histocompatibility antigen, A-1 alpha chain OS=Homo sapiens GN=HLA-A PE=1 SV=1	365	40.82	6.54	0	20.8064	0	25.2055	6	17	0	5		0	12.706	0	18.6301	5	10	0	5
P30455	>sp|P30455|1A36_HUMAN HLA class I histocompatibility antigen, A-36 alpha chain OS=Homo sapiens GN=HLA-A PE=1 SV=1	365	40.908	6.39	0	20.8064	0	25.2055	6	17	0	5		0	12.706	0	18.6301	5	10	0	5
P31944	>sp|P31944|CASPE_HUMAN Caspase-14 OS=Homo sapiens GN=CASP14 PE=1 SV=2	242	27.662	5.58	0	17.6885	0	20.6612	6	17	6	6		0	11.7806	0	17.3554	4	10	4	4
Q9NYU2-2	>sp|Q9NYU2-2|UGGG1_HUMAN Isoform 2 of UDP-glucose:glycoprotein glucosyltransferase 1 OS=Homo sapiens GN=UGGT1	1531	174.867	5.6	0	20.9404	0	7.05421	8	17	0	8		0	10.8005	0	4.04964	5	10	0	5
Q9NYU2	>sp|Q9NYU2|UGGG1_HUMAN UDP-glucose:glycoprotein glucosyltransferase 1 OS=Homo sapiens GN=UGGT1 PE=1 SV=3	1555	177.078	5.63	0	20.9404	0	6.94534	8	17	0	8		0	10.8005	0	3.98714	5	10	0	5
P13929-3	>sp|P13929-3|ENOB_HUMAN Isoform 3 of Beta-enolase OS=Homo sapiens GN=ENO3	391	42.222	7.97	0	19.7335	0	14.0665	3	14	0	3		0	9.65071	0	8.4399	2	7	0	2
P13929-2	>sp|P13929-2|ENOB_HUMAN Isoform 2 of Beta-enolase OS=Homo sapiens GN=ENO3	406	44.087	7.69	0	19.7335	0	13.5468	3	14	0	3		0	9.65071	0	8.12808	2	7	0	2
P13929	>sp|P13929|ENOB_HUMAN Beta-enolase OS=Homo sapiens GN=ENO3 PE=1 SV=5	434	46.957	7.71	0	19.7335	0	12.6728	3	14	0	3		0	9.65071	0	7.60369	2	7	0	2
Q8N1N4-2	>sp|Q8N1N4-2|K2C78_HUMAN Isoform 2 of Keratin, type II cytoskeletal 78 OS=Homo sapiens GN=KRT78	410	44.99	5.2	0	37.3239	0	28.0488	12	32	0	10		0	25.6943	0	23.1707	10	26	0	9
P08865	>sp|P08865|RSSA_HUMAN 40S ribosomal protein SA OS=Homo sapiens GN=RPSA PE=1 SV=4	295	32.833	4.87	0	32.0539	0	43.0508	9	26	0	9		0	19.5408	0	22.7119	7	20	0	7
P26232-3	>sp|P26232-3|CTNA2_HUMAN Isoform 3 of Catenin alpha-2 OS=Homo sapiens GN=CTNNA2	860	95.498	5.88	0	25.5352	0	11.0465	6	24	0	0		0	14.1729	0	7.09302	4	18	0	0
P26232-2	>sp|P26232-2|CTNA2_HUMAN Isoform 2 of Catenin alpha-2 OS=Homo sapiens GN=CTNNA2	905	100.384	5.96	0	25.5352	0	10.4972	6	24	0	0		0	14.1729	0	6.74033	4	18	0	0
P26232-5	>sp|P26232-5|CTNA2_HUMAN Isoform 5 of Catenin alpha-2 OS=Homo sapiens GN=CTNNA2	939	104.208	6.27	0	25.5352	0	10.1171	6	24	0	0		0	14.1729	0	6.49627	4	18	0	0
P26232	>sp|P26232|CTNA2_HUMAN Catenin alpha-2 OS=Homo sapiens GN=CTNNA2 PE=1 SV=5	953	105.247	5.71	0	25.5352	0	9.96852	6	24	0	0		0	14.1729	0	6.40084	4	18	0	0
Q99102-3	>sp|Q99102-3|MUC4_HUMAN Isoform 3 of Mucin-4 OS=Homo sapiens GN=MUC4	1827	194.028	6.42	0	21.1994	0	6.07553	7	16	0	7		0	14.0089	0	4.26929	5	10	0	5
P43358	>sp|P43358|MAGA4_HUMAN Melanoma-associated antigen 4 OS=Homo sapiens GN=MAGEA4 PE=1 SV=2	317	34.877	4.69	0	16.5629	0	15.4574	6	17	1	6		0	13.5684	0	17.3502	5	11	0	5
Q8N0Y7	>sp|Q8N0Y7|PGAM4_HUMAN Probable phosphoglycerate mutase 4 OS=Homo sapiens GN=PGAM4 PE=3 SV=1	254	28.759	6.65	0	22.8333	0	20.0787	4	20	0	4		0	12.6225	0	17.7165	3	14	0	3
Q99102-17	>sp|Q99102-17|MUC4_HUMAN Isoform 17 of Mucin-4 OS=Homo sapiens GN=MUC4	1943	206.476	6.27	0	22.1746	0	5.71282	7	15	0	7		0	12.3999	0	3.70561	5	9	0	5
O00410-2	>sp|O00410-2|IPO5_HUMAN Isoform 2 of Importin-5 OS=Homo sapiens GN=IPO5	1037	116.906	4.96	0	20.6373	0	8.87175	6	19	0	6		0	12.2878	0	7.13597	5	13	0	5
O00410	>sp|O00410|IPO5_HUMAN Importin-5 OS=Homo sapiens GN=IPO5 PE=1 SV=4	1097	123.55	4.94	0	20.6373	0	8.38651	6	19	0	6		0	12.2878	0	6.74567	5	13	0	5
O00410-3	>sp|O00410-3|IPO5_HUMAN Isoform 3 of Importin-5 OS=Homo sapiens GN=IPO5	1115	125.464	4.92	0	20.6373	0	8.25112	6	19	0	6		0	12.2878	0	6.63677	5	13	0	5
P05534	>sp|P05534|1A24_HUMAN HLA class I histocompatibility antigen, A-24 alpha chain OS=Homo sapiens GN=HLA-A PE=1 SV=2	365	40.663	6.34	0	17.8384	0	20	5	14	0	5		0	11.531	0	13.4247	4	8	0	4
P16188	>sp|P16188|1A30_HUMAN HLA class I histocompatibility antigen, A-30 alpha chain OS=Homo sapiens GN=HLA-A PE=1 SV=2	365	40.879	6.1	0	14.4454	0	16.4384	4	12	0	4		0	9.09974	0	9.86301	3	6	0	3
P30447	>sp|P30447|1A23_HUMAN HLA class I histocompatibility antigen, A-23 alpha chain OS=Homo sapiens GN=HLA-A PE=1 SV=1	365	40.707	6.34	0	14.4454	0	16.4384	4	12	0	4		0	9.09974	0	9.86301	3	6	0	3
P00491	>sp|P00491|PNPH_HUMAN Purine nucleoside phosphorylase OS=Homo sapiens GN=PNP PE=1 SV=2	289	32.097	6.95	0	19.3805	0	30.4498	7	20	3	7		0	18.5935	0	30.1038	7	15	4	7
P09525-2	>sp|P09525-2|ANXA4_HUMAN Isoform 2 of Annexin A4 OS=Homo sapiens GN=ANXA4	237	27.046	6.06	0	26.8023	0	35.865	7	21	0	7		0	18.3045	0	35.0211	6	16	0	6
P60660	>sp|P60660|MYL6_HUMAN Myosin light polypeptide 6 OS=Homo sapiens GN=MYL6 PE=1 SV=2	151	16.919	4.65	0	23.7821	0	47.6821	7	21	0	7		0	14.874	0	40.3974	6	16	0	6
P60660-2	>sp|P60660-2|MYL6_HUMAN Isoform Smooth muscle of Myosin light polypeptide 6 OS=Homo sapiens GN=MYL6	151	16.95	4.55	0	23.7821	0	47.6821	7	21	0	7		0	14.874	0	40.3974	6	16	0	6
P60900	>sp|P60900|PSA6_HUMAN Proteasome subunit alpha type-6 OS=Homo sapiens GN=PSMA6 PE=1 SV=1	246	27.382	6.76	0	24.7742	0	33.7398	7	20	0	7		0	14.5143	0	23.9837	5	15	0	5
Q92734-2	>sp|Q92734-2|TFG_HUMAN Isoform 2 of Protein TFG OS=Homo sapiens GN=TFG	396	42.994	5.17	0	18.5722	0	21.7172	6	16	0	6	Acetyl [N-Term]	0	13.7326	0	21.2121	5	11	0	5
Q92734	>sp|Q92734|TFG_HUMAN Protein TFG OS=Homo sapiens GN=TFG PE=1 SV=2	400	43.421	5.1	0	18.5722	0	21.5	6	16	0	6	Acetyl [N-Term]	0	13.7326	0	21	5	11	0	5
P29692	>sp|P29692|EF1D_HUMAN Elongation factor 1-delta OS=Homo sapiens GN=EEF1D PE=1 SV=5	281	31.103	5.01	0	20.2398	0	29.8932	6	15	0	6		0	13.3868	0	21.7082	4	10	0	4
P29692-2	>sp|P29692-2|EF1D_HUMAN Isoform 2 of Elongation factor 1-delta OS=Homo sapiens GN=EEF1D	647	71.364	6.42	0	20.2398	0	12.983	6	15	0	6		0	13.3868	0	9.42813	4	10	0	4
Q96HE7	>sp|Q96HE7|ERO1A_HUMAN ERO1-like protein alpha OS=Homo sapiens GN=ERO1A PE=1 SV=2	468	54.358	5.68	0	16.9191	0	14.7436	4	15	0	4		0	12.9742	0	12.3932	5	10	1	5
O14908-2	>sp|O14908-2|GIPC1_HUMAN Isoform 2 of PDZ domain-containing protein GIPC1 OS=Homo sapiens GN=GIPC1	236	26.055	5.57	0	21.4799	0	31.3559	6	16	0	6		0	12.9536	0	25	4	11	0	4
Q8IZP2	>sp|Q8IZP2|ST134_HUMAN Putative protein FAM10A4 OS=Homo sapiens GN=ST13P4 PE=5 SV=1	240	27.39	5.08	0	14.8205	0	22.0833	5	17	0	5		0	11.665	0	18.3333	4	12	0	4
P04181-2	>sp|P04181-2|OAT_HUMAN Isoform 2 of Ornithine aminotransferase, mitochondrial OS=Homo sapiens GN=OAT	301	32.832	5.33	0	13.6123	0	25.5814	6	14	0	6		0	10.5908	0	16.6113	4	9	0	4
Q92734-4	>sp|Q92734-4|TFG_HUMAN Isoform 4 of Protein TFG OS=Homo sapiens GN=TFG	280	30.902	5.01	0	14.5406	0	24.6429	5	13	0	5	Acetyl [N-Term]	0	10.422	0	23.9286	4	8	0	4
Q92734-3	>sp|Q92734-3|TFG_HUMAN Isoform 3 of Protein TFG OS=Homo sapiens GN=TFG	284	31.329	4.96	0	14.5406	0	24.2958	5	13	0	5	Acetyl [N-Term]	0	10.422	0	23.5915	4	8	0	4
P68104	>sp|P68104|EF1A1_HUMAN Elongation factor 1-alpha 1 OS=Homo sapiens GN=EEF1A1 PE=1 SV=1	462	50.109	9.01	0	34.5005	0	27.7056	9	34	0	9		0	31.0191	0	25.974	8	30	0	8
Q5VTE0	>sp|Q5VTE0|EF1A3_HUMAN Putative elongation factor 1-alpha-like 3 OS=Homo sapiens GN=EEF1A1P5 PE=5 SV=1	462	50.153	9.07	0	34.5005	0	27.7056	9	34	0	9		0	31.0191	0	25.974	8	30	0	8
P47895	>sp|P47895|AL1A3_HUMAN Aldehyde dehydrogenase family 1 member A3 OS=Homo sapiens GN=ALDH1A3 PE=1 SV=2	512	56.073	7.25	0	34.0642	0	27.1484	11	30	0	11		0	28.1422	0	21.875	9	26	0	9
P23381	>sp|P23381|SYWC_HUMAN Tryptophan--tRNA ligase, cytoplasmic OS=Homo sapiens GN=WARS PE=1 SV=2	471	53.132	6.23	0	21.0661	0	19.3206	6	19	0	6		0	14.3631	0	20.3822	7	15	0	7
P04181	>sp|P04181|OAT_HUMAN Ornithine aminotransferase, mitochondrial OS=Homo sapiens GN=OAT PE=1 SV=1	439	48.504	7.03	0	13.6123	0	17.5399	6	14	0	6		0	13.5034	0	14.5786	5	10	1	5
P07954-2	>sp|P07954-2|FUMH_HUMAN Isoform Cytoplasmic of Fumarate hydratase, mitochondrial OS=Homo sapiens GN=FH	467	50.181	7.4	0	23.1705	0	22.6981	7	19	0	7		0	13.0867	0	15.2034	5	15	0	5
P07954	>sp|P07954|FUMH_HUMAN Fumarate hydratase, mitochondrial OS=Homo sapiens GN=FH PE=1 SV=3	510	54.602	8.76	0	23.1705	0	20.7843	7	19	0	7		0	13.0867	0	13.9216	5	15	0	5
Q8TAA3-2	>sp|Q8TAA3-2|PSA7L_HUMAN Isoform 2 of Proteasome subunit alpha type-7-like OS=Homo sapiens GN=PSMA8	212	23.688	9.11	0	17.2176	0	29.2453	4	15	0	4		0	11.9575	0	24.0566	4	11	0	4
Q8TAA3-5	>sp|Q8TAA3-5|PSA7L_HUMAN Isoform 3 of Proteasome subunit alpha type-7-like OS=Homo sapiens GN=PSMA8	250	27.826	8.98	0	17.2176	0	24.8	4	15	0	4		0	11.9575	0	20.4	4	11	0	4
Q8TAA3	>sp|Q8TAA3|PSA7L_HUMAN Proteasome subunit alpha type-7-like OS=Homo sapiens GN=PSMA8 PE=2 SV=3	256	28.512	8.98	0	17.2176	0	24.2188	4	15	0	4		0	11.9575	0	19.9219	4	11	0	4
P60900-2	>sp|P60900-2|PSA6_HUMAN Isoform 2 of Proteasome subunit alpha type-6 OS=Homo sapiens GN=PSMA6	227	25.274	7.11	0	20.2487	0	28.1938	5	16	0	5		0	11.8484	0	22.0264	4	12	0	4
P23381-2	>sp|P23381-2|SYWC_HUMAN Isoform 2 of Tryptophan--tRNA ligase, cytoplasmic OS=Homo sapiens GN=WARS	430	48.82	6.48	0	17.9968	0	17.907	5	16	0	5		0	11.5337	0	19.0698	6	12	0	6
P17812	>sp|P17812|PYRG1_HUMAN CTP synthase 1 OS=Homo sapiens GN=CTPS1 PE=1 SV=2	591	66.648	6.46	0	17.1559	0	10.4907	6	17	1	6		0	10.46	0	7.78342	4	13	1	4
Q13162	>sp|Q13162|PRDX4_HUMAN Peroxiredoxin-4 OS=Homo sapiens GN=PRDX4 PE=1 SV=1	271	30.521	6.29	0	11.9508	0	19.9262	5	15	0	3		0	9.90247	0	11.0701	4	11	0	1
P10809-2	>sp|P10809-2|CH60_HUMAN Isoform 2 of 60 kDa heat shock protein, mitochondrial OS=Homo sapiens GN=HSPD1	158	17.089	9.83	0	33.8112	0	54.4304	7	33	0	7		0	22.6193	0	42.4051	5	30	0	5
Q99102-13	>sp|Q99102-13|MUC4_HUMAN Isoform 13 of Mucin-4 OS=Homo sapiens GN=MUC4	1176	130.331	6.34	0	17.6021	0	7.56803	6	14	0	6		0	16.4257	0	7.82313	6	11	0	6
Q99102-12	>sp|Q99102-12|MUC4_HUMAN Isoform 12 of Mucin-4 OS=Homo sapiens GN=MUC4	1125	125.049	6.11	0	15.5367	0	6.84444	5	11	0	5		0	14.9494	0	7.11111	5	8	0	5
Q14166	>sp|Q14166|TTL12_HUMAN Tubulin--tyrosine ligase-like protein 12 OS=Homo sapiens GN=TTLL12 PE=1 SV=2	644	74.356	5.53	0	16.2362	0	15.8385	6	15	6	6		0	13.9223	0	15.8385	6	12	6	6
P29034	>sp|P29034|S10A2_HUMAN Protein S100-A2 OS=Homo sapiens GN=S100A2 PE=1 SV=3	98	11.109	4.78	0	14.6289	0	27.551	3	15	0	3		0	12.0815	0	27.551	3	12	0	3
P01892	>sp|P01892|1A02_HUMAN HLA class I histocompatibility antigen, A-2 alpha chain OS=Homo sapiens GN=HLA-A PE=1 SV=1	365	40.896	6.99	0	17.0921	0	19.4521	5	15	0	0		0	11.6299	0	12.8767	4	12	0	0
P15531	>sp|P15531|NDKA_HUMAN Nucleoside diphosphate kinase A OS=Homo sapiens GN=NME1 PE=1 SV=1	152	17.138	6.19	0	14.2311	0	34.2105	4	14	0	1		0	11.2052	0	23.0263	3	11	0	1
P15531-2	>sp|P15531-2|NDKA_HUMAN Isoform 2 of Nucleoside diphosphate kinase A OS=Homo sapiens GN=NME1	177	19.641	5.58	0	14.2311	0	29.3785	4	14	0	1		0	11.2052	0	19.774	3	11	0	1
P13489	>sp|P13489|RINI_HUMAN Ribonuclease inhibitor OS=Homo sapiens GN=RNH1 PE=1 SV=2	461	49.941	4.82	0	15.9985	0	16.269	5	12	0	5		0	10.6666	0	12.3644	4	9	0	4
O14818-4	>sp|O14818-4|PSA7_HUMAN Isoform 3 of Proteasome subunit alpha type-7 OS=Homo sapiens GN=PSMA7	149	16.125	8.02	0	14.1813	0	32.8859	4	14	0	4		0	10.6339	0	32.2148	4	11	0	4
P29692-3	>sp|P29692-3|EF1D_HUMAN Isoform 3 of Elongation factor 1-delta OS=Homo sapiens GN=EEF1D	257	28.54	4.92	0	15.4056	0	23.3463	5	12	0	5		0	9.13276	0	14.3969	3	9	0	3
P10316	>sp|P10316|1A69_HUMAN HLA class I histocompatibility antigen, A-69 alpha chain OS=Homo sapiens GN=HLA-A PE=1 SV=2	365	40.951	6.9	0	14.4454	0	16.4384	4	12	0	0		0	9.09974	0	9.86301	3	9	0	0
Q14974	>sp|Q14974|IMB1_HUMAN Importin subunit beta-1 OS=Homo sapiens GN=KPNB1 PE=1 SV=2	876	97.108	4.78	0	23.7577	0	11.1872	8	24	0	8	Acetyl [N-Term]	0	23.6117	0	10.3881	7	22	0	7	Acetyl [N-Term]
P05091	>sp|P05091|ALDH2_HUMAN Aldehyde dehydrogenase, mitochondrial OS=Homo sapiens GN=ALDH2 PE=1 SV=2	517	56.346	7.05	0	30.8094	0	22.6306	10	24	0	10		0	23.0729	0	15.8607	7	22	0	7
P47929	>sp|P47929|LEG7_HUMAN Galectin-7 OS=Homo sapiens GN=LGALS7 PE=1 SV=2	136	15.066	7.62	0	18.5657	0	61.0294	6	17	6	6		0	19.3923	0	55.1471	5	15	5	5
P05091-2	>sp|P05091-2|ALDH2_HUMAN Isoform 2 of Aldehyde dehydrogenase, mitochondrial OS=Homo sapiens GN=ALDH2	470	50.957	6.2	0	25.4121	0	21.2766	8	18	0	8		0	18.2662	0	13.8298	5	16	0	5
Q86SG5	>sp|Q86SG5|S1A7A_HUMAN Protein S100-A7A OS=Homo sapiens GN=S100A7A PE=1 SV=3	101	11.298	7.44	0	15.4741	0	23.7624	3	20	0	3		0	14.1247	0	23.7624	3	18	0	3
P81605-2	>sp|P81605-2|DCD_HUMAN Isoform 2 of Dermcidin OS=Homo sapiens GN=DCD	121	12.406	7.97	0	16.8576	0	27.2727	4	15	0	4		0	13.2221	0	20.6612	3	13	0	3
P40227	>sp|P40227|TCPZ_HUMAN T-complex protein 1 subunit zeta OS=Homo sapiens GN=CCT6A PE=1 SV=3	531	57.988	6.68	0	17.1803	0	18.4557	7	17	1	7		0	12.5019	0	13.936	6	15	0	6
P22392	>sp|P22392|NDKB_HUMAN Nucleoside diphosphate kinase B OS=Homo sapiens GN=NME2 PE=1 SV=1	152	17.287	8.41	0	17.808	0	44.0789	5	18	0	2		0	12.4501	0	32.8947	4	16	0	2
P22392-2	>sp|P22392-2|NDKB_HUMAN Isoform 3 of Nucleoside diphosphate kinase B OS=Homo sapiens GN=NME2	267	30.118	8.92	0	17.808	0	39.3258	5	18	0	2		0	12.4501	0	26.5918	4	16	0	2
Q9BT78	>sp|Q9BT78|CSN4_HUMAN COP9 signalosome complex subunit 4 OS=Homo sapiens GN=COPS4 PE=1 SV=1	406	46.24	5.83	0	15.1635	0	13.0542	4	10	0	4		0	10.515	0	9.1133	3	8	0	3
Q14974-2	>sp|Q14974-2|IMB1_HUMAN Isoform 2 of Importin subunit beta-1 OS=Homo sapiens GN=KPNB1	731	81.127	4.72	0	11.7274	0	6.97674	4	10	0	4		0	9.44182	0	6.01915	3	8	0	3
P19971	>sp|P19971|TYPH_HUMAN Thymidine phosphorylase OS=Homo sapiens GN=TYMP PE=1 SV=2	482	49.924	5.53	0	22.0451	0	14.1079	6	17	0	6		0	16.7843	0	14.9378	5	16	0	5
P37802	>sp|P37802|TAGL2_HUMAN Transgelin-2 OS=Homo sapiens GN=TAGLN2 PE=1 SV=3	199	22.377	8.25	0	12.3404	0	33.1658	5	13	0	5		0	10.4853	0	27.1357	4	12	0	4
P37802-2	>sp|P37802-2|TAGL2_HUMAN Isoform 2 of Transgelin-2 OS=Homo sapiens GN=TAGLN2	220	24.438	8.25	0	12.3404	0	30	5	13	0	5		0	10.4853	0	24.5455	4	12	0	4
Q96P63	>sp|Q96P63|SPB12_HUMAN Serpin B12 OS=Homo sapiens GN=SERPINB12 PE=1 SV=1	405	46.247	5.53	0	12.1657	0	14.0741	4	12	0	4	Acetyl [N-Term]	0	9.40163	0	14.5679	4	11	0	4
Q96P63-2	>sp|Q96P63-2|SPB12_HUMAN Isoform 2 of Serpin B12 OS=Homo sapiens GN=SERPINB12	425	48.415	5.39	0	12.1657	0	13.4118	4	12	0	4	Acetyl [N-Term]	0	9.40163	0	13.8824	4	11	0	4
Q08188	>sp|Q08188|TGM3_HUMAN Protein-glutamine gamma-glutamyltransferase E OS=Homo sapiens GN=TGM3 PE=1 SV=4	693	76.584	5.86	0	11.9613	0	6.34921	3	11	3	3		0	8.93405	0	5.48341	3	10	3	3
P08195-3	>sp|P08195-3|4F2_HUMAN Isoform 3 of 4F2 cell-surface antigen heavy chain OS=Homo sapiens GN=SLC3A2	568	61.778	5.21	0	78.6117	0	46.831	23	66	0	23	Acetyl [N-Term]	0	69.3616	0	45.9507	20	66	0	20
P08195	>sp|P08195|4F2_HUMAN 4F2 cell-surface antigen heavy chain OS=Homo sapiens GN=SLC3A2 PE=1 SV=3	630	67.952	5.01	0	78.6117	0	42.2222	23	66	0	23	Acetyl [N-Term]	0	69.3616	0	41.4286	20	66	0	20
P08195-4	>sp|P08195-4|4F2_HUMAN Isoform 4 of 4F2 cell-surface antigen heavy chain OS=Homo sapiens GN=SLC3A2	661	71.079	4.97	0	78.6117	0	40.2421	23	66	0	23	Acetyl [N-Term]	0	69.3616	0	39.4856	20	66	0	20
Q5T749	>sp|Q5T749|KPRP_HUMAN Keratinocyte proline-rich protein OS=Homo sapiens GN=KPRP PE=1 SV=1	579	64.093	8.27	0	26.2709	0	19.3437	9	29	9	9		0	27.2105	0	22.2798	11	29	11	11
P07384	>sp|P07384|CAN1_HUMAN Calpain-1 catalytic subunit OS=Homo sapiens GN=CAPN1 PE=1 SV=1	714	81.838	5.67	0	20.4706	0	14.7059	8	18	3	8		0	25.2717	0	18.0672	9	18	6	9
P40227-2	>sp|P40227-2|TCPZ_HUMAN Isoform 2 of T-complex protein 1 subunit zeta OS=Homo sapiens GN=CCT6A	486	53.255	7.27	0	15.2109	0	15.0206	6	15	0	6		0	12.5019	0	15.2263	6	15	0	6
P13804-2	>sp|P13804-2|ETFA_HUMAN Isoform 2 of Electron transfer flavoprotein subunit alpha, mitochondrial OS=Homo sapiens GN=ETFA	284	30.007	8.57	0	16.7262	0	25	5	13	0	5		0	11.8855	0	26.0563	5	13	0	5
P13804	>sp|P13804|ETFA_HUMAN Electron transfer flavoprotein subunit alpha, mitochondrial OS=Homo sapiens GN=ETFA PE=1 SV=1	333	35.058	8.38	0	16.7262	0	21.3213	5	13	0	5		0	11.8855	0	22.2222	5	13	0	5
P53396-3	>sp|P53396-3|ACLY_HUMAN Isoform 3 of ATP-citrate synthase OS=Homo sapiens GN=ACLY	830	91.041	8.68	0	17.4669	0	12.2892	7	12	0	7		0	11.1049	0	6.98795	4	12	0	4
P53396-2	>sp|P53396-2|ACLY_HUMAN Isoform 2 of ATP-citrate synthase OS=Homo sapiens GN=ACLY	1091	119.695	7.33	0	17.4669	0	9.34922	7	12	0	7		0	11.1049	0	5.31622	4	12	0	4
P53396	>sp|P53396|ACLY_HUMAN ATP-citrate synthase OS=Homo sapiens GN=ACLY PE=1 SV=3	1101	120.762	7.33	0	17.4669	0	9.26431	7	12	0	7		0	11.1049	0	5.26794	4	12	0	4
Q00610-2	>sp|Q00610-2|CLH1_HUMAN Isoform 2 of Clathrin heavy chain 1 OS=Homo sapiens GN=CLTC	1639	187.771	5.69	0	183.374	0	36.1196	47	159	0	47		0	173.049	0	37.3398	49	160	0	49
Q00610	>sp|Q00610|CLH1_HUMAN Clathrin heavy chain 1 OS=Homo sapiens GN=CLTC PE=1 SV=5	1675	191.493	5.69	0	183.374	0	35.3433	47	159	0	47		0	173.049	0	36.5373	49	160	0	49
P08195-2	>sp|P08195-2|4F2_HUMAN Isoform 2 of 4F2 cell-surface antigen heavy chain OS=Homo sapiens GN=SLC3A2	529	57.909	5.35	0	76.5404	0	47.0699	22	65	0	22		0	69.3616	0	49.3384	20	66	0	20
P31151	>sp|P31151|S10A7_HUMAN Protein S100-A7 OS=Homo sapiens GN=S100A7 PE=1 SV=4	101	11.464	6.77	0	18.5888	0	34.6535	4	23	1	4		0	20.0478	0	35.6436	5	24	2	5
Q96FW1	>sp|Q96FW1|OTUB1_HUMAN Ubiquitin thioesterase OTUB1 OS=Homo sapiens GN=OTUB1 PE=1 SV=2	271	31.264	4.94	0	14.6581	0	24.7232	6	15	0	6		0	15.0196	0	22.5092	6	16	0	6
P19971-2	>sp|P19971-2|TYPH_HUMAN Isoform 2 of Thymidine phosphorylase OS=Homo sapiens GN=TYMP	487	50.373	5.53	0	15.9436	0	10.0616	4	12	0	4		0	14.7567	0	10.883	4	13	0	4
O60763	>sp|O60763|USO1_HUMAN General vesicular transport factor p115 OS=Homo sapiens GN=USO1 PE=1 SV=2	962	107.828	4.91	0	16.1163	0	6.54886	5	11	0	5		0	12.2238	0	6.34096	5	12	0	5
O60763-2	>sp|O60763-2|USO1_HUMAN Isoform 2 of General vesicular transport factor p115 OS=Homo sapiens GN=USO1	973	109.127	4.89	0	16.1163	0	6.47482	5	11	0	5		0	12.2238	0	6.26927	5	12	0	5
P15259	>sp|P15259|PGAM2_HUMAN Phosphoglycerate mutase 2 OS=Homo sapiens GN=PGAM2 PE=1 SV=3	253	28.748	8.88	0	24.8198	0	20.1581	5	20	0	5		0	20.3594	0	18.1818	5	22	0	5
P50991-2	>sp|P50991-2|TCPD_HUMAN Isoform 2 of T-complex protein 1 subunit delta OS=Homo sapiens GN=CCT4	509	54.685	7.83	0	12.9824	0	13.7525	5	11	0	5		0	14.7986	0	13.7525	6	13	0	6
P50991	>sp|P50991|TCPD_HUMAN T-complex protein 1 subunit delta OS=Homo sapiens GN=CCT4 PE=1 SV=4	539	57.888	7.83	0	12.9824	0	12.987	5	11	0	5		0	14.7986	0	12.987	6	13	0	6
Q05639	>sp|Q05639|EF1A2_HUMAN Elongation factor 1-alpha 2 OS=Homo sapiens GN=EEF1A2 PE=1 SV=1	463	50.438	9.03	0	17.7907	0	12.095	5	17	0	5		0	21.2663	0	12.095	5	20	0	5
P25311	>sp|P25311|ZA2G_HUMAN Zinc-alpha-2-glycoprotein OS=Homo sapiens GN=AZGP1 PE=1 SV=2	298	34.237	6.05	0	15.7808	0	23.8255	5	14	1	5		0	18.3119	0	28.1879	7	19	1	7
P02794	>sp|P02794|FRIH_HUMAN Ferritin heavy chain OS=Homo sapiens GN=FTH1 PE=1 SV=2	183	21.212	5.55	0	22.9734	0	43.1694	8	24	0	8		0	29.4564	0	44.2623	8	30	0	8
P05109	>sp|P05109|S10A8_HUMAN Protein S100-A8 OS=Homo sapiens GN=S100A8 PE=1 SV=1	93	10.828	7.03	0	13.5489	0	38.7097	4	14	4	4		0	15.0198	0	47.3118	5	21	5	5
P53675-2	>sp|P53675-2|CLH2_HUMAN Isoform 2 of Clathrin heavy chain 2 OS=Homo sapiens GN=CLTCL1	1583	180.181	5.78	0	34.5907	0	6.19078	9	28	0	9		0	37.5114	0	8.84397	13	39	0	13
P53675	>sp|P53675|CLH2_HUMAN Clathrin heavy chain 2 OS=Homo sapiens GN=CLTCL1 PE=1 SV=2	1640	186.91	5.85	0	34.5907	0	5.97561	9	28	0	9		0	37.5114	0	8.53659	13	39	0	13
P06702	>sp|P06702|S10A9_HUMAN Protein S100-A9 OS=Homo sapiens GN=S100A9 PE=1 SV=1	114	13.234	6.13	0	12.3719	0	31.5789	3	13	3	3		0	25.8445	0	52.6316	6	33	6	6
P30153	>sp|P30153|2AAA_HUMAN Serine/threonine-protein phosphatase 2A 65 kDa regulatory subunit A alpha isoform OS=Homo sapiens GN=PPP2R1A PE=1 SV=4	589	65.267	5.11										0	9.49995	0	6.79117	4	6	0	4
P0CF74	>sp|P0CF74|LAC6_HUMAN Ig lambda-6 chain C region OS=Homo sapiens GN=IGLC6 PE=4 SV=1	106	11.27	7.24										0	11.0546	0	28.3019	2	8	0	2
P0CG04	>sp|P0CG04|LAC1_HUMAN Ig lambda-1 chain C regions OS=Homo sapiens GN=IGLC1 PE=1 SV=1	106	11.341	7.87										0	11.0546	0	28.3019	2	8	0	2
P0CG05	>sp|P0CG05|LAC2_HUMAN Ig lambda-2 chain C regions OS=Homo sapiens GN=IGLC2 PE=1 SV=1	106	11.287	7.24										0	11.0546	0	28.3019	2	8	0	2
P0CG06	>sp|P0CG06|LAC3_HUMAN Ig lambda-3 chain C regions OS=Homo sapiens GN=IGLC3 PE=1 SV=1	106	11.231	7.24										0	11.0546	0	28.3019	2	8	0	2
B9A064	>sp|B9A064|IGLL5_HUMAN Immunoglobulin lambda-like polypeptide 5 OS=Homo sapiens GN=IGLL5 PE=2 SV=2	214	23.049	8.84										0	11.0546	0	14.0187	2	8	0	2
Q9UL46	>sp|Q9UL46|PSME2_HUMAN Proteasome activator complex subunit 2 OS=Homo sapiens GN=PSME2 PE=1 SV=4	239	27.384	5.73										0	9.93056	0	25.1046	4	8	0	4
P63244	>sp|P63244|RACK1_HUMAN Receptor of activated protein C kinase 1 OS=Homo sapiens GN=RACK1 PE=1 SV=3	317	35.055	7.69										0	9.60586	0	13.8801	4	8	0	4
P25789	>sp|P25789|PSA4_HUMAN Proteasome subunit alpha type-4 OS=Homo sapiens GN=PSMA4 PE=1 SV=1	261	29.465	7.72										0	9.60555	0	15.3257	4	8	0	4
Q9H4A4	>sp|Q9H4A4|AMPB_HUMAN Aminopeptidase B OS=Homo sapiens GN=RNPEP PE=1 SV=2	650	72.549	5.74										0	9.45642	0	6	4	8	0	4
Q9HCY8	>sp|Q9HCY8|S10AE_HUMAN Protein S100-A14 OS=Homo sapiens GN=S100A14 PE=1 SV=1	104	11.655	5.24										0	14.4866	0	39.4231	4	9	4	4
P62158	>sp|P62158|CALM_HUMAN Calmodulin OS=Homo sapiens GN=CALM1 PE=1 SV=2	149	16.827	4.22										0	8.88667	0	22.1477	2	9	0	2
P49773	>sp|P49773|HINT1_HUMAN Histidine triad nucleotide-binding protein 1 OS=Homo sapiens GN=HINT1 PE=1 SV=2	126	13.793	6.95										0	8.93017	0	23.8095	3	10	1	3
P29508	>sp|P29508|SPB3_HUMAN Serpin B3 OS=Homo sapiens GN=SERPINB3 PE=1 SV=2	390	44.537	6.81										0	11.8966	0	12.8205	4	11	0	4
P31949	>sp|P31949|S10AB_HUMAN Protein S100-A11 OS=Homo sapiens GN=S100A11 PE=1 SV=2	105	11.733	7.12										0	11.7234	0	35.2381	3	11	3	3
Q13867	>sp|Q13867|BLMH_HUMAN Bleomycin hydrolase OS=Homo sapiens GN=BLMH PE=1 SV=1	455	52.528	6.27										0	10.6388	0	9.67033	4	11	0	4
P07195	>sp|P07195|LDHB_HUMAN L-lactate dehydrogenase B chain OS=Homo sapiens GN=LDHB PE=1 SV=2	334	36.615	6.05										0	10.2709	0	16.1677	4	11	1	4
Q9BWD1	>sp|Q9BWD1|THIC_HUMAN Acetyl-CoA acetyltransferase, cytosolic OS=Homo sapiens GN=ACAT2 PE=1 SV=2	397	41.324	6.92										0	10.1439	0	12.5945	3	11	0	3
Q9BWD1-2	>sp|Q9BWD1-2|THIC_HUMAN Isoform 2 of Acetyl-CoA acetyltransferase, cytosolic OS=Homo sapiens GN=ACAT2	426	44.614	8.46										0	10.1439	0	11.7371	3	11	0	3
P09497-2	>sp|P09497-2|CLCB_HUMAN Isoform Non-brain of Clathrin light chain B OS=Homo sapiens GN=CLTB	211	23.167	4.69										0	9.18958	0	17.5355	4	12	0	4
P09497	>sp|P09497|CLCB_HUMAN Clathrin light chain B OS=Homo sapiens GN=CLTB PE=1 SV=1	229	25.175	4.64										0	9.18958	0	16.1572	4	12	0	4
Q562R1	>sp|Q562R1|ACTBL_HUMAN Beta-actin-like protein 2 OS=Homo sapiens GN=ACTBL2 PE=1 SV=2	376	41.976	5.59										0	15.2805	0	15.9574	5	16	1	0
P01833	>sp|P01833|PIGR_HUMAN Polymeric immunoglobulin receptor OS=Homo sapiens GN=PIGR PE=1 SV=4	764	83.232	5.74										0	19.9725	0	12.9581	8	17	8	8
P01834	>sp|P01834|IGKC_HUMAN Ig kappa chain C region OS=Homo sapiens GN=IGKC PE=1 SV=1	106	11.602	5.87										0	16.8944	0	49.0566	4	19	0	4
Q6UWP8	>sp|Q6UWP8|SBSN_HUMAN Suprabasin OS=Homo sapiens GN=SBSN PE=1 SV=2	590	60.505	7.01										0	27.2955	0	23.0508	5	21	5	5
P01877	>sp|P01877|IGHA2_HUMAN Ig alpha-2 chain C region OS=Homo sapiens GN=IGHA2 PE=1 SV=3	340	36.503	6.1										0	23.207	0	28.5294	7	23	0	1
P01876	>sp|P01876|IGHA1_HUMAN Ig alpha-1 chain C region OS=Homo sapiens GN=IGHA1 PE=1 SV=2	353	37.631	6.51										0	29.9256	0	33.4278	9	29	3	3
P13646-2	>sp|P13646-2|K1C13_HUMAN Isoform 2 of Keratin, type I cytoskeletal 13 OS=Homo sapiens GN=KRT13	355	38.557	4.98										0	22.7007	0	13.5211	6	42	0	1
P13646-3	>sp|P13646-3|K1C13_HUMAN Isoform 3 of Keratin, type I cytoskeletal 13 OS=Homo sapiens GN=KRT13	420	45.839	4.88										0	28.5903	0	14.0476	7	46	0	1
P13646	>sp|P13646|K1C13_HUMAN Keratin, type I cytoskeletal 13 OS=Homo sapiens GN=KRT13 PE=1 SV=4	458	49.557	4.96										0	28.5903	0	12.8821	7	46	0	1
